# Supplementary material for: Positive Selection in Bifidobacterium Genes Drives Species-Specific Host–Bacteria Communication
Source: Front Microbiol. 2019 Oct 15;10:2374. doi: 10.3389/fmicb.2019.02374 (PMC6803598; doi:10.3389/fmicb.2019.02374)
Supplement: DATA SHEET S5 — MSA of the duf58 gene before treatment with Gblocks. [file Data_Sheet_5.FASTA]

>GCF_000010425.1_WP_011743631.1
------------------------------------------------------------------------------------------------------ATGCGGCATTCGCACACA------GTGCAGCGCAGACGGACC------------------------------------------------------------ATCCAACGATCCCTACGCCGCCTCAAACATCGCATCAAGCGACTGGCCACCTCATACGTGTCGCCGCTTGGCTGGGCGGTGACGGCGCTCGCCGTCGCCTCGCTGGTGGCGTTCGTCCTGCTGGGATGGCATGAGCTGCTGGCCATGGCGGTGGTGTTCGCGGTCATGCTGGCCGCGGCGGTCATGCTTTCCCTTGGCAACACCTCGTTCCAAGCCACCATCGACGTGTCCAGCAGACGCGTCACGGTGTCAGACACGGTGAAAGTCGACGTCTGCGTGGAC------AATCCGGGCCGCACCCCCACCACGTCGGCGCGCGGCGACCTGCCCATCGGAGAC---------------------------AACCACGAACGGTTCGCCATTCCCATGCTCGCCGCAGGCCAGTCACGCCAGACGACTGTGGAATTCACCGCCGTCAGCCGTGCGGTGCTGCCCATCGGCCCGCTATCCATCCGCAAAGGCGACCCGTTCGGTCTGATCCGCCACGAAAAGAAACTCGTGGACCAGATCAACGTGTTCATTCATCCGCAGACCGTGCTGCTCAGCACCCTGAAC---GCCGGCATTCCACGCGATTTGGAAGGTCAGCCAAGCGGCGAAATCGTCGACGACGACCTCGACTTCTACGGCCTGCGCGAATACGAGCCCGGCGATGACGTGCGCAACGTGCATTGGCTCAGCTCCGCGAAAACCGGATCGCTTATGATCCGCCAATACGAAGCCACCCGCCGTACCGACACCGCTCTGACCATCAGCGTGAACCCGGATGATTACATCGATTCCCAGGAATTCGAACTGGCCGTATCCGTCCACGCCTCCATCGGCGTGCAATGCCTGCAGCAGAACCGGCCAGTCACCGCGCATGCCGGTTCCACGCACGCCATT---------------------------------------------------------------------------------------------CCGCGCAACGCCACGGAATTTCTCGATGGCTGCAGCGGCATCGAC------------------CCTGACATCGAC---------------------------------------------------------------------------------------------------------------------------------------GACAATCCCAACCTCGCGCAAACCACTCTCGAACATGCC------CCCGACGCATCCTTCTACTTCTTCACCGTCGGCAGGCTCAAAACCATCGACGACATCAAACACATGGTCCTCGCACTC------CCCCGCTCCGCAACCTGCGTGGTGCTTCAAGCCGCAACC---------------------------------GGCCAACCGCGCGCCATCAAACGCTACTCCGACTTCACCTTGGCAACCGTGGGAGACCTCAACGACCTCCCCATGATCATGGGGGTGCTGGCATGA---------------------
>GCF_000022965.1_WP_004218261.1
------------------------------------------------------------------------------------------------------------------------------------------------------------------------------------------------------------------------------------ATGGCGAGCGCTGACATGGCCATACGGAAATACGTATCGCCATTGGGCTGGGCGGTGGCCGGCATGTTCGTGCTCACGCTCGCGTTGTTCCTATGCCTGGGTTGGGTGGAGATGCTTGCGTTCGCACTCGTGTGCGCCACGTTGCTCGTAAGCTCCGCGGCGCTTTCAGTGGGCAACACTGCGTTCACGGCCACGCTTTCGGTATCGAACACGCGGGTGAGCGTCAACCAGACGATGCACGCCATGGTCACCGTGTCG------AATCCGAGCACCTCCGTCACCGCGAGCGCGAGCGGCGATCTGCCGATATCCCAGAGCAACTACGGC---AGTCTCGAGTGGCACCATGAACGCTTCGCCATACCGAGTCTCGGCGCCCACCAGTCGAAGCAGACGGCGATTCCCCTCACCGCAACGCATCGCGCGGTGGTCACAGTCGGGCCATTGTCGGTGCGCAAAGGAGACCCGTTCGGCCTGGTGCGGCGCGAGCATCGTCTCACCGAGCAGATCCGCGTGTACATTCACCCGGACATCGTGCCGCTGCACACACTGCAC---GCCGGAATCATACGTGATCTGGAGGGCAATCCGAGCGACGACCTCGTCAATGACGACCTGAGTTTCTTCGGTCTGCGCGAATACGAATATGGTGACGACGTGCGCAATGTGCACTGGCTGAGCACCGCGAAAACGGGAACGCTCATGATCCGGCAATTCGAAGCCACGCGTCGCACCGATTCGTCGGTGAGTCTTGACGTTGCGGCGTTTTCGTATGCGAGCGCCGAGGAGTTCGAACTCGCGGTGAGCGTGTTCGCCTCGATTGGCGTGCAGTGTGTGTCAGAACGGCGTGCGCTGTATGCGCAATCCGGCAGATTGCATGTGCAG---------------------------------------------------------------------------------------------CCGCGCAAACCCGCCGACTTTCTCGACACGTGCAGTGAGATCGAA------------------CCTGAAACGCGTGGG------------------------------------------------------------------------------------------------------------------------------GGCACCATGCTGGCGAATCTGGCACGCGAGGCCCTGCTTGCCTGC------GACAAGGCATCGCTGTACTGCTTTGTCGCCGGTTCCGCGCATGAGGTGGACGATCTGCGCAGGCTTGGCGCCGCCATT------CCGGATTCGGCGACCTGCGTGGTCGTGCAGGTCGTCGCC---------------------------------GGGGCGAGCAGCGCGGTGCGCACGCTGCCGGAATGCGTGTTCATCACGGTCGGCGTGCTCGACGACCTTCCGCTACTCATGGAGGTGCTCTCATGA---------------------
>GCF_000260715.1_WP_041777046.1
---------------------------------------------------------------------------------------------------------------------------------------------------------------------------------------------------------------------------------------------------ATGATCATACGGAAATATGTATCGCCGTTGGGATGGGCAGTGGTCGGCATGTTCGTGCTCACACTCGCGCTGTTCCTATGCCTGGGTTGGGTGGAGATGCTCGCATTCGCATTGGTGTGCGCCACGTTGCTCGTAAGCTCCGCAGTGCTTTCGGTGGGAAACACGACGTTCAGCGCCACGCTTTCGGTATCGAACACACGGGTGAGTGTCAACCAGACGATGCACGCCATGGTCACCGTGTCG------AATCCGAGCACCTCCGTCACCGCGAGCGCAAGCGGCGATCTGCCAATATCACAGAGCAGCTACGAGCGCCGCGATGAGCGGCATCATGAACGCTTCGCCATACCGAGTCTCGGCTCCCACCAGTCGAAACAGACGGCGATCCCCCTCACCGCAACGCATCGTTCGGTGGTCACAGTGGGACCGCTGTCGGTGCGCAAAGGAGACCCGTTCGGCCTAGTGCGGCGCGAGTATCGTCTCACCGAGCAGATCCGCGTGTACATTCACCCGGACATCGTGCCGCTGCACACACTGCAC---GCCGGCATCATACGTGACCTGGAAGGCAATCCGAGCGACGACCTCGTCAACGACGACCTGAGTTTCTTCGGTCTGCGCGAATACGAATATGGCGACGACGTGCGCAATGTGCATTGGCTGAGCACCGCGAAAACGGGAACGCTCATGATTCGGCAATTCGAAGCCACGCGTCGCACCGATTCGTCGGTGAGCCTTGACGTTGCGGCGTTTTCGTATACGAGCGCCGAGGAGTTCGAACTCGCGGTGAGCGTGTTCGCCTCGATTGGCGTGCAGTGTGTGGTGGAACGGCGTGCGCTGTATGCGCAAGCGGGCAGATTGCATGTGCAG---------------------------------------------------------------------------------------------CCGCGCAAACCCGCCGACTTTCTCGACACATGCAGTGAAATCGAA------------------CCTGATGTGCGGGCG------------------------------------------------------------------------------------------------------------------------------AGCACCATGCTGCCGAATCTGGCACGTGAGGCCCTACTTGCCTGT------GACAAGGCATCGCTGTACTGTTTCGTCGCCGGTTCCGCGCATGACGTGGGCGATCTGCGCAGGCTTGGCGCCGCCATT------CCGAATTCGGCGACCTGTGTGGTGGTGCAGGTCGTCGCC---------------------------------GGCGCGAGCAGCGCGGTGCGCATGCTGCCGGAATGCGTGTTCGTCACGGTCGGCGTGCTTGATGACCTTCCACTGCTCGCGAAGGTGCTCTCATGA---------------------
>GCF_000347695.1_WP_044282201.1
------------------------------------------------------------------------------------------------------ATGCAGCAATCGCACACC------ATGCGGCGCAGAACAGCC------------------------------------------------------------ACGGTACGCACCCTGCGACGCATCAGGCACCGGGCCAAACGGCTGCTCACCTCGTATATCTCCGTTCCCGGATGGACCGTCATCGCCCTGGCCATCATCTCGGCGACGGCGTTCCTTATGCTCGGATGGCACGAACTGCTCGCCATGGCGGTGGCGTTCACTGCCATGATGATATGTGCGGTTGTGCTGTCGCTCGGCAACACCACCTTCAACGCCACCATCGATATGTCCCGCCTACGGGTCACTGTATCGGACGAGGTGGCCGTCAACGTATGCGTCAAC------AATCCCGGCCGCACACCCACCGCTTCGGCGCGAGGCGACCTGCCCATCGGCGAC---------------------------AACCACGAGCGCTTCACCATCCCCATGCTCGCCGCAGGGCAGTCACGCATAACAACCGTGGAATTCACCGCAGTATCGCGGGATATCCTGTCCATCGGCCCCCTGTCCATCCGCAGAGGCGACCCATTCGGCTTAGTGCGCCGTGAGAGGCGACTCACCGAGCAGATCACCGTGTTCATCCATCCGCGCACAGTCGCGCTGAATACGCTCAGC---GCAGGCGTCCCCCGCGACCTCGAAGGCCAGCCAAGCAACGAAATCGTGGACGATGACCTGGATTTCCACGGTCTGCGCGAATATGCCCCAGGCGACGACGTACGCAACATCCACTGGCTCAGCTCTGCGAAAACCGGAACACTGATGATCCGCCAATACGAAGCCACCCGACGCACCAACACCTCACTGACCATCAGTATGAATCCCCATGATTATGCACACCCGCAGGAGTTTGAACTTGCGGTGTCAGTCCACGCATCCATCGGCGTGCAGTGCCTGCAACAGGACCGGCCGGTGACCGCCCACGCCGGAATCAACCACACAACA---------------------------------------------------------------------------------------------CCCAGCAATCCCACGGAATTCCTGGATGATTGCAGCAGCATCGAC------------------CCCGATATCGAC---------------------------------------------------------------------------------------------------------------------------------------GACAACCCCAATCTCGCGCAGGACACGCTTGCGCACGCC------CGGGATGCATCGTTCTATTTCTTCACGGTCGGAAGCCTCAAAACCATTGGCATCATCAAACGCATGGCGCTGGCGCTC------CCCCACAGCGCGACCTGCGTAGTCCTGCAAACCGCGCCG---------------------------------GGACAGCCACGCGCCATCAGACACTACCCTGATTTCATCCTGGTAACCGTAGGAGACCTCGACGACCTCCCGATCATCATGGGAGCACTGGTATGA---------------------
>GCF_000522505.1_WP_034874838.1
------------------------------------------------------------------------------------------------------ATGCAGGATTCCCGAATA------GTGCGGCGCAGACGAACC------------------------------------------------------------ATGACACGGTTCCTGCGCCGCGTCGGACACCGGCTGAGACGCCTGTTCACCGCATACGTCTCACCGTTGGGCTGGGCGGTGGCGGTACTGGCCGTGACCGCACTGGCCACGTTCGCGATCCTCGGCTGGCATGAGCTGCTTGCCATGGCGACGGCGTACCTGCTGATGCTGTTTGCCGCGATACTGATGTCGTTGGGCAACACGTCGTTCTCCGCCTCCATCGACGTATCCGACAGGCGCGTGACCGTGGGCGACACGGTACAGGTGAGGGTGGCCATCGAC------AATCCCGGCAATACGCCGACCGCTTCGGCACGTGGCGACCTGCCGATAGGAGAT---------------------------AACCACGAACGGTTCACCATTCCGATGCTCGCGGCGGGCCAGTCGCGTCAGACCGACGTGGAGTTCACCGCCATGGCGCGTGCGGTGCTGCCGGTCGGCCCCCTGTCGATCCGCAAAGGCGACCCATTCGGCCTGGTACGCCACGAAAAACGACTCGTCGACCGGATCCAGGTGTTCATTCACCCACCGACCGTGACGCTCAATACGTTGAAC---GCCGGCATCCAACGCGACCTCGAAGGGCAGCCGAGCGGCGAGATCGTGGATGACGATCTTGACTTCTACGGCCTACGCGAATACGAGCCGGGCGATGACGTGCGCAATGTGCACTGGCTGAGCTCCGCGAAAATCGGTTCGCTGATGATCCGCCAATATGAGGCCACACGACGCACCGACACCGCCATGGGCATCAGCGTGAACCCCGACGACTATACCGACGCCCAGGAATTCGAGCTGGCCGTGTCGATCCACGCCTCCATCGGCGTGCAATGCCTGCTGCAGAACCGCCCGCTGACCGCACACGCCGGCGACGAGCACACCACA---------------------------------------------------------------------------------------------CCACGCAACGCCACGGCGTTCCTGGATTCCTGCAGCGCCATCGAA------------------CCGAACCTCGAC---------------------------------------------------------------------------------------------------------------------------------------GATAATCCGAACCTGGCGCAGGGCACGCTCGAATACGCC------GCCGACGCCTCGTTCTACTACTTCACCGTCGGCCGGCTCAAGGACGTGGACGAGATCAAGCACATGGCGCTCGCATTG------CCCCGTTCCGCAACCTGCGTGGTGTTGCAGGCCGCCGTC---------------------------------GGGCAGCAACGCGCCATACGAAGATTCCCGAACTTCACCCTAGCCACGGTCGGCGATCTGAACGATCTGCCGATGATCATGGGGGTGCTGTCATGA---------------------
>GCF_000706765.1_WP_081830748.1
------------------------------------ATGAGCACCAGGCCCTGGCCGAAGCCCTTGAAGGGGTTCCCGTGCCCACAACAGAGCACTGAAGGCATGACCGCAATGAGCTCC------GACAAGACCTCACGACCA---------------------------------------------------------ACCTCAGGGACCGTCCGTGAACCGACCGCCCATGCCTTATGGTGCCGGGTCCTCTCCATGGTGACACCACTCGGGTGGGGACTGGCCCTGGTCGCGGTCATTGCCGGTCTCGGGCTGGCCCTGACCGGCTGGGCCGAACTCCTGGCCCTTGCCCTGTCCAGCCTGGCCCTGATTGCCGCAGGGATGGTCATGAGCATGGGGAATCTGGGATACAAGGCGGAAGTCGACCTGAACAGGACCCATCTGAGTGTGGGCCAGGAGTCGGAACTCTCCATCATCCTGACC------AACCCCGGCAAGCAATCCACCCGCAGCGGCAGAGTCGGCATCCTGGTCGGGGCC---------------------------GAACCCTCCCACCTGCCGGTACCGGCACTATCGCCCGGACAGTCCGCCCACCTGCACCTGAATCTCCAGGCCCTGCGCCGCGGCGCCATATCCTTGGGCCCGGTCACTGTGGAGGCAGGCGACCCCTTCGGGGTGATTCGCCGACAGAGGGTTCTGGCCGCCGGAAACCAGGTTTATGTCCACCCGAGAACGATTGACCTTGATTCCATCACT---GCCGGACTGCAACGGGACCTGGAAGGGCAGACGACTTCGGGAACCGTCGACGACGATATGGAGTTCCATACTCTACGCCCCTATGAGCCCGGAGACGACATCAAACGTGTCCACTGGTTGTCCACGGCCAAGACCGGTTCCATGATGGTCCGCCAGTATGAGCCCACACTCCGCACGGATACCGTCCTCTGGATGGATACGGACCCGACCTCATATTCCACCGCCGAGGAATTCGAACTGGCCGTCAGCATCTTCGCATCCCTGGGAGCTCGCTGCCTCCTTGACGACCGCGCGCTGGCCGCCATGATTCCCGCCGGCCAGACCGGCAACCATGCCGGATCGAACAGGGACGGGCAGATGAGCAACCGGAGAGTCGGCTTATCGCAAAACCGACCGACACGTGACGCAGACCTTCTTCGCACGGATACGCCCCGTGCCTTCCTTGATGCCTGCAGCCTCATCCTCCCTGTCCAGAAGCCCACCGAGGGAAGT---------------------------------------------------------------------------------------------------------------------------------------GTCCGTCAAACCTCGGTCTCCTGGCTCAACATGATGGAATCCCATATCCCCGACGCTTCTTTGGTCCTGCTGGTGAGCGGCTCCCGTCCGGACCAGACGGATATCGAGACCATGGCAGCAGGTCTC------CCCAAGTCCATCCGATCCATGGTCCTGACCGCAGCACAA---------------------------------GGAGAACGACCAACCATCCAGCAGCTGGGCACACTGACCCGGGCGCGGTTGGGCACCCTGGGAAACCTACCTCAGCTGTTGAGGACCCTCTCATGA---------------------
>GCF_000737845.1_WP_052377541.1
------------------------------------------------------------------------------------------------------------------------------------------------------------------------------------------------------------------------------------------------------ATGGCCACGGCATATGTCACGCCGTTCGGATGGCTGGTCTTCATCGCCGGCGCATCCTGGCTGGCGCTGTTCCCGCGACTGGGATGGTATGAGCTCCTCACTGGCGGGGTGCTTGCCTTGACAATGGTCGCCTCGGGGATAATCATGTCGTTGGGCAACACCAGGCTTGAGTCCACGCTCAGCCTCTCGGCGGACCGCGTCACCGCAGGGGATGCCGTGACAATCAACGTCACGGTTTCA------AACCCAGGGAAAACGCCCACAACGCGGGCCTGGGGCGACCTGCCTTTAGGCGAC---------------------------CTCCACGAGCAATTCCGCATCCCCGCGCTACCCGCGGGCGGCCGAGAGAGCCTCGAGGTTGATTTCATCGCCAAACAGCGCGCGGTGCTCGATGTTGGCCCACTGACGGTACGCAAAGGCGACCCTTTCGGTCTGGTGCGTCATAGACGTTCCATAGCCGAGCGGACCAAGGTCTACATTCACCCTAAAACAGTGAGTCTCAATCCTCTGGAA---TCCGCAATGGTACGCGACCTCGAAGGCAGCCCGAGCGGTCAGATCGTCGATGACGACTTGGATTTCTATGGGTTGCGCGACTACCATGATGGCGACGACATTCGCAACATCCATTGGCTCAGTTCCGCAAAATCGGGCCGAATGATGGTTCGTCAATACGAGGCGACCAAGCGTACCGACACATCACTGACCCTGGACACAGATCCGAAGGATTACACAGGCCCGGACCAATTCGAACTCGCTGTAAGCGTTCTGGCATCCCTGGGCGTGCAATGCCTTGAGCAGAACCGACCACTGACCGCCCACGCAGCCTCGGCAACAGTCCGT---------------------------------------------------------------------------------------------CCCTCATCCCCGTTGGCATTATTGGACTGGTGCAGTGCCATCAAG------------------CCGCACTTCTCA---------------------------------------------------------------------------------------------------------------------------------------CCAAGCAGGGACATGGCGGTGGGCACCCTTAAGGGGAAT------CCCGCTTCGTCATGCTACTTCCTCGTCGTCGGACCACTCGTGCCCCAGGACGCGTTGAGGCGCATCGCCTCCGCGTTT------CCCAAAGCCGCCGCCTGCATCATCATACGAATCGACACC---------------------------------ACGGCGGAACGGGCCATACGACAGTATGACGACTTCACATCGGCCACCCTCGGTTCGATCGAGGACCTTCAATTGGTCATGGAGGCGATTTCATGA---------------------
>GCF_000737865.1_WP_081870308.1
------------------------------------ATGAGCACCAGGCCCTGGCCGAAGCCCTTGAAGGGGTTCCCGTGCCCACAACAGAGCACTGAAGGCATGACTGCAATGAGCTCC------GACAAGACCTCACGACCA---------------------------------------------------------ACCTCAGGGACCGTACGTGAACCGACCGCCCATGCCTTATGGTGCCGGGTCCTCTCCATGGTGACACCACTCGGGTGGGGACTGGCCCTGGTCGCGGTCATTGCCGGTCTCGGTCTGGCCCTGACCGGCTGGGCCGAACTCCTGGCCCTTGCCCTGTCCAGCCTGGCCCTGATTGCCGCAGGGATGGTCATGAGCATGGGGAATCTGGGATACAAGGCGGAAGTCGACCTGAACAGGACCCATCTGAGTGTGGGCCAGGAGTCGGAACTCTCCATCATCCTGACC------AACCCCGGCAAGCAATCCACCCGCAGCGGCAGAGTCGGCATCCTGGTCGGGGCC---------------------------GAACCCTCCCACCTGCCGGTACCGGCGCTATCGCCCGGACAGTCCGCCCACCTGCACCTGAATCTCCAGGCCCTGCACCGCGGCGCCATATCCTTGGGCCCCGTCACCGTGGAGGCAGGCGACCCCTTCGGGGTGATTCGCCGACGGAGGGTTCTGACCGCCGGAAACCAGGTTTATGTCCACCCGAGAACGATTGACCTTGATTCCATCACT---GCCGGACTGCAACGGGACCTGGAAGGGCAGACGACTTCGGGAACCGTCGACGACGATATGGAGTTCCATGCTCTACGCCCCTATGAGCCCGGAGACGACATCAAACGTGTCCACTGGTTGTCCACGGCCAAGACCGGTTCCATGATGGTCCGCCAGTATGAGCCCACACTCCGCACGGATACCGTCCTCTGGATGGATACGGACCCGACCTCATATTCCACCGCCGAGGAATTCGAACTGGCCGTCAGCATCTTCGCATCCCTGGGAGCGCGCTGCCTCCTTGACGACCGCGCGCTGGCCGCCATGATTCCCGCCGGCCAGACCGGCAACCATGCCGGATCGAACAGGGACGGGCAGATGAGCAACCGGAGAGTCCGCTTATCGCAAAACCGACCGACACGTGACGCAGACCTTCTTCGCACGGATACGCCCCGTGCCTTCCTTGATGCCTGCAGCCTCATCCTCCCTGTCCAGAAGCCCACCGAGGGAAGT---------------------------------------------------------------------------------------------------------------------------------------GTCCGTCAAACCTCGGCCTCCTGGCTCAACATGATGGAATCCCATATCCCCGACGCTTCTTTGGTCCTGCTGGTGAGCGGCTCCCGTCCGGACCAGACGGATATAGAGACCATGGCAGCAGGTCTC------CCCAAGTCCATCCGATCCATGGTTCTGACCGCAGCACAA---------------------------------GGAGAACGACCAACCATCCAGCGGCTGGGCACACTGACCCGGGCGCGGTTGGGCACCCTGGGAGACCTACCTCAGCTGTTGAGGATCCTCTCATGA---------------------
>GCF_000741165.1_WP_081891952.1
---------------------------------------------------------------------------------------------------------------------------------------------------------------------------------------------------------------ATGAACGTCCGCCACCGGCTCCGGCAACGTCTTGGCCGATCTCAGCGTCCGTCGGTGTCGCCACTGGGGTGGCTGGCCTTGACGTTCGGAGCCGGCTGTCTGATGTCGTTCCCCTTTACCGGTTGGTCGGGAGCGCTGTCGGCGGGCATCGCGCTGGTTTTCCTGTCCGTCATGGCCTTTGCCTTGTCAAGCAATGCCGTGTGCGGGGATGTCTCGATCGTCGTGTCCGCGTTGCGACTGACGGCAGGCGAATCCCTCGGCATCAGCGTGACAGCGAAG------AATCCTGGCGTTTCCGTCATACCGCCATGCCGCGCGCTGATGCCGGTCGGCTCG---------------------------AATATGCACCGTATCCGTTTTCCGCGTCTTGGCATTGGTGGCAGGGAATCGATCCGGTTGGAGGTCGAGTCGCGGTCCCGCTGCGTGCTGGACATCGGTCCTGTCCTGATTCGTTCGGGTGACCCGCTAGGGCTGATGCACGGGGAACGTCGGGGCACGGATGCTTGCCGCGTGTTTGTTCATCCGCGTACCGTGCGGTTTCGCATGCCGGAT---GTGGGCGCGGCCCATGATCTGGATGGCGAGCCGAGTGGCCGCATCGTCGACGACGATTTCGACTTCCAGGGGCTGCGCGAATATCGACCGGGTGACGATCTGCGCGGCGTGCATTGGCTGAGCACGTCGCGTACGGGCAAACTGATGGTGCGGCAACATGATGCGTCGTGCCGGGTCGATACCGATCTGCTGATCGATGCGGATGGTTCCGGTTATGCCGATGATGCCGAATTCGAGCTTGCGGTCAGCATATTCGCCTCCATCGGAGCTCAATGCCTGCTGTCGCGCCGACCGTTGACCGCGCAAGCCAGCGGCGAATGCGTTCGT---------------------------------------------------------------------------------------------CCACGGCATGCCGATGAGTTCCTTGATTTTTGCAGCACAATTGCAGCGGTTTCCGAACCGGCTCCCGGTGCAGGATTCGGT------------------------------------------------------------------------------------------------------------------------GCCGGACGATTCGATGCGCCGTGGCATCGATCGTTTGCGCTTCGCACC------GGCCCATCCGTTCTGCAGTGCACGGTCATTGGATCCCGGCATGATCCCGCAACCTATGCGCATGTCCCAACATTCCGT------TCCGGAACCGATCGCCTGGTGGTGCAGACGCAGCCAGAACCGTCCGATCACGAGACGTACGGCCGGCACGACGGAGCCCGGTCCCGCGTCATGAGCATGTATGGCACAGTGGTGGCTCGCATCGGAGCGCTCGATGAGCTGCCCGTGATCATGGAGGTCCTGTCATGA---------------------
>GCF_000741205.1_WP_006294483.1
---------------------------------------------------------------------------------------------------------------------------------------------------------------------------------------------------------------ATGCGGCGCCTGCACCGGCTGCATCGGCATATTCGCCGCTGGCTGCGCGCCTACGTCTCCCCATTGGGATGGGCCACGCTCGCACTGGCCATCATGTTGTGGGTCACGTTCGGCTGTTTTGGCTGGCATGAGCTGTTGGCCGCGGCGATCGTGTGCACAGTCATGCTGTTGGCCGCGCTCGTGATGAGCCTGGGCAACACGGCGTTTGACGCAACGATCAGCGTTTCGCAGTTGCGCGTGAGCATCAATGACGAGGTCAACGTGCAGGTTGACGTGCGC------AATCCGGGCTCAGCTCCCACGGCGAGCGCGCGTGCCGACCTGCCGATGGGTGAC---------------------------ATGCATGAACGTTTCAACATTCCGATGCTCGGTTCGCACCAGTCGAAGCACACGTCAGTCAGTTTCAAAGCGGTGACGAGAGCTGTGCTGCCCGTGGGTCCGTTGATGATTCGCAAGGGCGACCCGTTTGGCCTGATGCGTCATGAACACAAGCTTGCGCAGCGCGTGACTGTGTTCATTCATCCCGACATTGTGATTCTGGACCGCTTGCAT---GCTGGCATTCCGCGTGATCTTGAGGGCAATCCGAGCGGCGACATTGTGGATGACGACCTTGATTTTTATGGCTTGCGTGAGTATGAGCCCGGCGATGACGTGCGCAACGTGCACTGGTTGAGTTCGGCGAAGACACGCACGTTGATGATTCGCCAGTTTGAGGCGACGAGGCGTACCGACACGTCGATCACGTGCGATGTGAATCCTGATGATTACCCGGATTCTCGCGCGTTCGAGCTGGCCGTGAGCGTGCACGCCTCGCTTGGCGTGCAGGCGTTGCGTGAGGGTCGTCCGCTCTACATGAACGCAGGTTCAACGCATGTCAAG---------------------------------------------------------------------------------------------CCCGCGAATCCCACGCAGTTTTTGGACCAGTGCAGTGCGATTGAA------------------CCCGATTTTCAG---------------------------------------------------------------------------------------------------------------------------------------GATGAACGCAATTTGGTGCGTGGCGCGTTGATGTTCACG------CCCGACGCTTCGTTCTATGCGATTACGGTCGGCGCGTTCAAACCGTTGGACGATATTCGTCATATGGTCATGGCGCTT------CCGGCGGCTGCCACCTGTTTGGTTGTGCAGGTCGCTCCG---------------------------------GGGGCTCCGCGCGCTCTGCATGTGTTCCCCGAGTTCACGCTGGCTACCGTGGGTTCGCTTGATGATTTGCCGCCGGTGATGGGAGCGTTGCGATGA---------------------
>GCF_000741365.1_WP_033498918.1
------------------------------------------------------------------------------------------------------ATGCGGCAATCGCAGACA------ATGCAGCGCAGACGAACC------------------------------------------------------------CTCAAACGGTCGCTGCGCCGCATCAGGCATCGCATCAAACGGCTGGTCACCTCATACGTCTCCCCGCTCGGATGGGTCGTGATGGCGCTCGCCATCGCCTCGCTCGTGGCGTTCAGCCTCCTCGGATGGCATGAGCTGCTGGCCATGGCGGCGGTGTTCATCGTCATGCTGGTCACAGCGGTCATCCTCTCGCTTGGCAACACGTCGTTCAAAGCGACCATCGACGTATCTGAAAAACGAGTCACCGTATCGGACACCGTGCAGGTCGAAGTCTGCGTGGAC------AATCCCGGACGCACCCCCACCGCCTCGGCCCGCGGAGATCTGCCCATCGGAGAC---------------------------AACCACGAGAAGTTCGCCATTCCGATGCTCGCAGCCGGCCAATCACGCCAGACGAACGTGGAATTCACCGCCGTCTCCCGCGCCGTGCTGCCCATCGGCCCCTTGTCGATCCGCAAAGGCGACCCGTTCGGACTGATCCGTCACGAAAAGAAACTCGTCGACCAGATCAACGTGTTCATCCACCCGCAGACCGTCATGCTCAACACCCTGAAC---GCCGGCATTCCACGCGATCTGGAGGGGCAGCCAAGCGGCGAAATCGTGGACGACGACCTCGATTTCTACGGACTGCGCGAATACGAGCCCGGCGATGATGTGCGCAACGTTCACTGGCTCAGCTCCGCGAAAACCGGCTCACTGATGATACGCCAATACGAGGCCACGCGCCGCACCGACACCGCCCTGACCATCAGCATCAATCCGGACGACTACATGGACGCCCGGGAATTCGAGCTAGCCGTGTCCATCCACGCCTCCATCGGCGTGCAATGCCTGCAACAACACCGTCCCGTGAGCACGCAGGCCGGAACCGAGCATGCGAAG---------------------------------------------------------------------------------------------CCGCGTAACACCACAGAGTTCCTCGACGGGTGCAGCGCCATCGAA------------------CCGGATCTCGAC---------------------------------------------------------------------------------------------------------------------------------------GACAATCCCAACCTCGCCCAGGCAACGCTTGCGAACGCC------CCGGACTCGACCTTCTACTTCTTCACCGTCGGCAGGAACAAAGACATCGACTCCATCAAACGCATGGTGCTCGCGCTC------CCCCGCTCCGCGACCTGCGTTGTATTGCAGGCCGTGACC---------------------------------GACCAACCCCGCGCCATCAAACGATATTCCGACTTCACATTGGCAACCGTGGGAGACCTCAACGATCTTCCCCTGATCATGGGGGTGTTGGCATGA---------------------
>GCF_000741445.1_WP_044092431.1
------------------------------------------------------------------------------------------------------ATGCAGCAATCACACACC------ATGCGGCGCAGAACAGCC------------------------------------------------------------ACAGTACGCACCCTGCGACGCATCAGGCACCGGGCCAAACGGCTGCTCACCTCGTATATCTCCGTTCCCGGATGGACCGTCATCGCCCTGGCCATCATCTCGGCGACGGCGTTCCTTATGCTCGGATGGCACGAACTGCTCGCCATGGCGGTGGCGTTCACTGCCATGATGATATGTGCGGTCGTGCTGTCGCTCGGCAACACCACCTTCAACGCCACCATCGATGTGTCCCGCCTACGGGTCACTGTATCGGACAAGGTGGCCGTCAACGTATGCGTCAAC------AATCCCTGCCGCACACCCACCGCTCCGGCGCGAGGCGACCTGCCCATCGGCGAC---------------------------GACCACGAGCGCTTCACCATCCCCATGCTCGCCGCAGGGCAGTCACGCATAACAACCGTGGAATTCACCGCAGTATCGCGGGATATCCTGCCCATCGGCCCCCTGTCCATCCGCAGAGGCGACCCATTCGGCCTAGTGCGCCGTGAGAAGCGACTCACCAAGCAGATCACCGTGTTCATCCATCCACGCACAGTCGCGCTGAACACGATCAGC---GCAGGCGTCCCCCGCGACCTCGAAGGCCAACCAAGCAACGAAATCGTGGACGATGACCTGGATTTCCACGGTCTGCGCGAATATGCCCCAGGTGACGACGTGCGCAACATCCACTGGCTCAGCTCTGCGAAAACCGGAACACTGATGATCCGCCAATACGAAGCCACCCGACGCACCAACACCTCACTGACCATCAGTATGAATCCCCATGATTATGCACACCCGCAAGAGTTTGAACTTGCGGTGTCAGTCCACGCATCCATCGGCGTGCAGTGCCTGCAACAGGACCGGCCGGTGACCGCCCACGCCGGCATCAACCACACAACA---------------------------------------------------------------------------------------------CCCCGCAATCCCACGGAATTCCTGGATGATTGCAGCGGCATCGAC------------------CCCGATATCGAC---------------------------------------------------------------------------------------------------------------------------------------GACAACCCCAATCTCGCGCAGGACACGCTTGCGCACGCC------CGGGATGCATCGTTCTATTTCTTCACGGTCGGAAGCCTCAAAACCATTGGCGTCATCAAACGCATGGCGCTGGCGCTC------CCCCACAGCGCGACCTGCGTAGTCCTGCAAACCGCGCCG---------------------------------GGACAGCCACGCGCCATCAGACACTACCCTGATTTCACCCTGGCAACCATAGGAGACCTCGACGACCTCCCGATCATCATGGGAGCACTGGTATGA---------------------
>GCF_000741455.1_WP_029576649.1
------------------------------------------------------------------------------------------------------ATGCAGCAATCGCACACC------ATGCGGCGCAGAACAGCC------------------------------------------------------------ACGGTACGCACCCTGCGACGCATCCGGCACCGGGCCAAACGGCTGCTCACCTCGTATATCTCCGTTCCCGGGTGGACCGTCATCGCCCTGGCCATCATCTCGGCGACGGCGTTCCTTATGCTCGGATGGCACGAACTGCTCGCCATGGCGGTGGCGTTCACAGCCATGATGATATGTGCGGTTGTGCTGTCGCTCGGCAACACCACCTGCAACGCCACCATCGATGTGTCCCGCCGCCGGGTCACTGTATCGGACAAGGTGGCCGTCAACGTATGCGTCGAC------AATCCCGGCCGTACACCGACCGCTTCGGCGCGAGGCGACCTGCCCATCGGCGAC---------------------------GACCACGAGCGCTTCACCATCCCCATGCTCGCCGCAGGCCAGTCACGCATGACAACCGTGGAATTCACCGCAGTATCGCGGGATATCCTGCCCATCGGCCCCCTGTCCATCCGCAGAGGCGACCCATTCGGCCTAGTGCGCCGTGAGAGGCGACTCACCAAGCAGATCACCGTGTTCATCCATCCGCGCACAGTCGCGCTGAATACGCTCAGC---GCAGGCGTCCCCCGCGACCTCGAAGGCCAGCCAAGCAACGAAATCGTGGACGATGACCTGGATTTCCACGGTCTGCGCGAATATGCCCCAGGCGACGACGTGCGCAACATCCACTGGCTCAGCTCTGCGAAAACCGGAACACTGATGATCCGCCAATACGAAGCCACCCGACGCACCGACACCTCGCTGACCATCAGTGTGAATCCCCATGATTATGCGCACTCGCAGGAGTTTGAACTTGCGGTGTCAGTCCACGCATCCATCGGCGTGCAGTGCCTGCAACAGGACCGGCCGGTGACCGCCCACGCCGGCATCAACCACACAACA---------------------------------------------------------------------------------------------CCCCGCAATCCCACGGAATTCCTGGATGATTGCAGCGGCATCGAC------------------CCCGATATCGAC---------------------------------------------------------------------------------------------------------------------------------------GACAACCCCAATCTCGCGCAGGACACGCTTGCGCACGCC------CGGGACGCATCGTTCTATTTCTTCACGGTCGGAAGCCTCAAAACCATTGGCATCATCAAACGCATGGCGCTGGCGCTC------CCCCACAGCGCGACCTGCGTAGTCCTGCAAACCGCGCCG---------------------------------GGACAGCCATGCGCCATCAAGCACTACCCCGATTTCACCCTGGCAACCATAGGAGACCTCGACAACCTCCCGATCATCATGGGAGCACTGGTATGA---------------------
>GCF_000741525.1_WP_081930327.1
------------------------------------------ATGCGCGAGCATCGGCGCCGAGGCGCAGGGCGTCGACGCCCGAGCGGCGACGGCAGGCGACCGCTCGAAAAACTCGTCAACGGCAAGCACGGACCGAAGAAT---------------------------------------------------------------CGCCGCACACTCGTCAAGGCCTTTCACACGGCGCCCGAACGGCTCACCGCCTACATCTCCCCTCTGGGTTGGGCCGTGGGCTCCTTGGGGATCGTATGTCTGGCCGTATTCCCGGTTTTGGGCTGGCATGAGCTGCTGGTGTGCGGCACCATCGCGCTGACGATGTGCCTGGCCGGCGTCATAATGACGCTCGGCAACACAAGATTCAACGCATCGCTCAAGCTGTCGGACGAGCGCATCACCGTGGGCGACATGGTGAGCGTGTCGGTGTCCATCGAC------AATCCGAGCAGAACCCCGACGGTGAGCGCCGACGGCGACCTTCCCATGGGCGAG---------------------------GTTCACGAACGCTTCCGTATCACGGCCCTGACACCTGGCAAGAGTCAGCAACGGAATGTGGAATTCCGCGCCACCGCCCGTGCCGTGCTGCCCGTCGGACCTTTGAGAATCTGCAAGGGTGATCCGTTCGGCCTGATCCGCCACGAACGGTCCCTTTCCGATGCCATCAAGGTCTATATCCACCCCAGAACGGTGCGGCTGAACACACTGGAC---TCAGGCCGATTCCGCGATCTTGAGGGGGGCCCTTCGGGTCAAGTGGTGGATGACGATCTGGACTTCTACGGTCTGAGAGAATACCGTCCCGGCGACGACATACGCAATATCCATTGGCTCTCTTCGGCCAAAACCGGCACGATGATGGTTCGGCAATACGAGGCCACCAAACGCACCGACACCTCGATTACGTTGGGGGTCGACCCGATTGACTACCGCAACGAAAACGAGTTCGAGCTGGCCGTAAGCTTGGCCGCGTCCATCGGAGCGCAATGCCTGTTGCAGGACAGGCCCCTCAAGGCGCAGGCATCAACCCAGGAGTGCAGT---------------------------------------------------------------------------------------------CCACACACGGCCACTGAATTTCTCGACTGGACAAGCTCGATTGAG------------------CCCGACCTCGAC---------------------------------------------------------------------------------------------------------------------------------------GAGAACGCCAACCTGGCCATAACCACGTTGAAAAACAGC------CCGAACGCATCGTTCTACTTCTTCGTCATCGGCTCGGCCACGAACCTCGCGCGCATCCGACGAGTAGCGTCAGCCCTG------CCCAAGGCCTCCGTCTGCATCATGCTGAAGGCCTCCATC---------------------------------GGACAGGAGAGCCTGATCCGACAATACGACGGATTCACAATGGCCACCGTGCCGACGTTGGACGACCTACCGCTGGTCATGGAGGCCCTGAAATGA---------------------
>GCF_000741535.1_WP_026502829.1
------------------------------------------------------------------------------------------------------ATGCGGCAATCACAGACA------ACGCGGCGCAACAGAACG------------------------------------------------------------TTCCAACGTTCGATGCGTCGGATCGGACGCCGGGCCGAGCGGCTGGCCACGTCAACCGTGTCCCCGCTTGGCTGGGCGGTTATCGTTCTTGCCATCGTTTGCACTGTGGCGTTCGCACGGCTGGGCTGGCATGAGCTGCTTGCCATGGCGGTCGTGTTGGCGACCATGACGGTATGTGCGATTGCGATGTCGCTGGGCAATACCGCGTTCAACGCCGCCATCGACGTGTCCGACCGGCGGGTCACGGTGTCTGACACAGTGGATGTCAACGTAACCGTGGAT------AATCCCGGCCGCACGCCGACCGCTTCGGCGCGTGGCGATTTGCCGATCGGCGAG---------------------------CATCATGAGCGGTTCACCATTCCTATCCTTGCCGCCGGCCAGTCGAAACACACGAGCGTGCAGTTCACGGCTATCAGCCGCGGAGTATTGCCAGTCGGCCCGTTGTCCATCCGCAAGGGCGATCCGTTCGGCTTGATTCGTCGTGAACGGCGGCTCGCCGAGCATATCGACGTGTTCATCCACCCTCGCACCGTGATGCTCAACACGTTGAAT---GCCGGTATCCCGCGCGATTTGGAGGGCCAGCCGAGCGGTGAGATCGTTGATGACGATCTTGATTTCTACGGGCTGCGTGAGTATGAGCCCGGGGATGACGTGCGTAACGTGCACTGGCTGAGTTCCGCGAAAACGGGCGCGCTGATGATCCGCCAGTATGAGGCCACCCGGCGTACCGACACCGCATTGACGATCAGTATCACCCCCAATGACTATCGCGACGCCCAGGAGTTCGAGCAGGCGGTGTCCATTCATGCTTCCATCGGCGTGCAATGCCTGCAACAGGGCCGACCGGTCACCGCACACGCCGGCACCCGGCACACGTCG---------------------------------------------------------------------------------------------CCGCGGCATGCCACCGAGTTTCTTGACGAATGCAGCGCCATCGTC------------------CCCGATATCGAC---------------------------------------------------------------------------------------------------------------------------------------GACAATCCCAATCTTGCGCAGGATACGCTCGTCCGTGCG------CCGGACGCGACGTTCTATTTCTTCACTGTCGGCAGCATGAAACCTCTCGATGTCATCAAACGTATGACGTTGGCTTTG------CCGCATAGCGCGACCTGCGTGGTGTTGCAAACCGCGCCC---------------------------------GGCCAGCCGCGCGGCATCAAACGGTACGCCGGTTTCACGCTGGCGACTGTGGGAGACCTTGCCGATTTGCCGATCATCATGGGGGTGTTGGCATGA---------------------
>GCF_000741575.1_WP_034258287.1
------------------------------------------------------------------------------------------------------ATGACGGATTCCGCACGCGCGCTGCGC---CGGCGCCGCGAC------------------------------------------------------------CGGTCACGGCGCCGGGCCGGGCTGCGCCGCCGCCTGCGCCACTGGACGCGCGCCTACGTCTCGCCGCTGGGCTGGACGGTGCTCGGACTGGACGTGCTGCTGTGGGTGTGTTTCGCCTGCTTCGGCTGGCACGAGATGCTGGCCGCGGCAATCGTGGCGACGGTGCTGCTGGCCGCCGCGCTCGTCATGTCCCTGGGCAACACCTCCTTCGACGCGCGCCTGGCGGTCTCGCGGCGGCGCGTGGTGGTGGGCGACGAGGTGAACGTGCAGGTCGACGTGTCC------AACCCCGGTTCCTCGCCCACCGCGAGCGCCCGCGCGGACCTGCCGATGGGCGAC---------------------------GTGCACGAGCGCTTCGGCATCCCCATGCTGGGTGCGCACCAGTCGAAGCACACGGCTGTGTCCTTCAAGGCGGTCACCCGCGCGGTGCTTCCGGTGGGTCCGCTCATGATCCGCAAGGGCGACCCCTTCGGCCTGATGCGCCATGAGCTGCGGCTGGCGCAGCGCATCAACGTGTACATCCACCCGGACGTCGTCATGCTCGAACGGCTGCAC---GCGGGCGTGCCGCGCGACCTGGAGGGCAACCCGAGCGGCGACATCGTGGACGACGACCTCGACTTCTTCGGCTTGCGCGAGTACGAGCCGGGCGACGACGTGCGCAACGTGCACTGGCTGAGTTCCGCGAAGGCGCGCAAGCTCATGATCCGCCAGTTCGAGGCGACGCGCCGCACGGACACGTCAATCTCCTGCGACGTGCACCCGGACGACTACCCGAGCCAGGCGGCCTTCGAGCTGGCCGTGAGCGTGCACGCCTCCCTGGGCGTGCAGGCGCTGCGCGAGGACCGTCCACTGGCCATGAACGCGGGTGCCTTGCGCACGCGC---------------------------------------------------------------------------------------------CCGGCGAACGTGATGCAGTTCCTGGACCAGTGCAGCGCCATCGAA------------------CCGGACTTCGAC---------------------------------------------------------------------------------------------------------------------------------------GACGAACGCAACCTGGTGCGCGGCGCCATGGCCGCCATG------CCGGACGCGTCCTTCTACGCCTTCACGGTGGGTCCGGCCAAGCCCCTGGAGGAGGTCCGGCACATGGCGATGGCGCTG------CCGGCCGGCGCCACCTGCCTGGTGGTGCAGGCGTCGTTG---------------------------------GGCGCGGAGCGCGCCCTGCGCCGCTTCCCGGAGTTCACGCTGGCGACGGTGGGCGCGCTCGACGACCTGCCCGCGGTGATGGGGGCGATGCGATGA---------------------
>GCF_000741695.1_WP_044090134.1
------------------------------------------------------------------------------------------------------ATGCCGCATTCATCGTCA---------------CGCATACAT------------------------------------------------------------CCCAGGCGCATGTTCGTCAATGCGGTCAGACATATCGCCCATGCTGTCAATGCCTGCATCTCCCCGCTCGGATGGGCGGTAGGGCTGAGCGCCGCAGCCTGCCTCGGATCGTTCGCATGGCTCGGATGGCATGAGCTGCTCGCTTTCGGCATCACGGCCGCAGTGATGCTCATCGTCGCGGTCGTACTGTCCCTGGGCAACACCAGTTTCACCGCACATATCAGCGCGTCAAATCAACGCGTGACCGTGGGTGACGACATACGCATCACCATTGATATCGAC------AACACCAGTGCCGCAGCCACGGCCAGCGCGCAAGGCAGCCTGCCCATCGGAGAC---------------------------GAACATGAATGGTTCAGCATCCCCATGCTGGCGCCACGGCAAGCCAAACGCACCGAGCTGGCATTCCGCGCCCTGCAACGCGCCGCCCTGCCCATCGGACCGTTGCACATCCGCAAAGGGGACCCCTTCGGACTGATTCGCCATGACAAACGATTGGCCGAGCGCATCATCGTCTACATCCATCCGAAAACAATTCCGCTGCGTTCAGTGAAT---GCGGGCATTCCCCGCGACCTGGAAGGGCGTCCTTCCGGACAGATCGTCGATGACGACCTCGACTTCCACGGGTTGCGTGAGTATACGCCCGGAGATGATGTGCGCAACGTGCATTGGCTGAGCTCGGCAAAAACCGGCTCCCTGATGATCCGTCAGTATGAGGCCACGAAACGCACAGACACCTCGCTGACCATCAGCGTCAATCCTGATGGATACGCCACAGCACAGGAATTCGAACTGGGGGTCTCCATCCATGCGTCCATCGGCGTCGCATGTCTTGCACAGCATAGACCCGTCTCCACGCATGCCGGAACCAGACACGTCCGC---------------------------------------------------------------------------------------------CCGCGCAATGCGATGCTGCTGCTTGACGAAGCCAGCGGCATCGCA------------------CCGAGCCGGCAGAGT---------------------------------------------------------------------------------------------------------------------------------CAAGACCATCTCAATCCCGTACAGAGCACTCTGGAGCACTCG------CCCGACGCCTCATGCTACATGTTCGTCGTGGGTTCTCTCATCACCGTCGATCAGCTCAAGCAAGCCACTCAGGCATTA------CCCCCATCAGCCAAGTGCGTGGTGCTGCAAGCCAGCGTA---------------------------------GGCGCATATCGCTCCATGGAACGGTTCGCCCGCTTCACTCTGGCGACGGTGGGCGAACTGGATGACCTTCCCCTCATCATGAAGGCCCTCACATGA---------------------
>GCF_000741785.1_WP_084686278.1
ATGTTCCGTTCCAGACGTACCGCGACGGCGCAGCCGGCGGGAGCGCCGGCCGGCCGGACCGTCGGCTCCACGGCTCCGTCC---------------GGCGTGCCGACGGCGGCCGAGCTCGCGCGCCGTTCGCGCCGGCGCCGG------------------------------------------------------------GTCTCGCGCGCCGTCAGGCGGGTCCTGCACCGGATCCGCCGCCTGTTCACGTCCTACATCTCCCCGTTGGGGTGGGCGGTGGCGGTCTCCGGCATCGCCGCGCTCGCCGCGTTCCTCCCGCTCGGATGGCATGAGCTGCTCGCCTACGGCGTGGTCGCCATGACGATGACGCTCGCCGCCGTGATCATGTCGCTCGGCAACACCTCGTTCAAGGCGACGATCGGATTGCCGCGCCGTCGCGTCACCGTCGGCGACACGGTGGCGGTGCGCGTCGACATCGCC------AATCCGGGCCGCACGCCCACCGCGAACGCGCGCGGCGACCTGCCGATCGGCGAG---------------------------ATGCACGAACGGTTCTCCATCCCCATGCTCGCCCCCGGCCAGTCGAAGCAGACCGACGTGGAGTTCCGCACGCTTTCGCGCGCCGTGCTCTCCATCGGCCCGCTGCGCATCCGCAAGGGCGACCCGTTCGGTCTCGTCCGCCACGAGAAGCGTCTCGCCGACAAGCTCGACCTGTTCATCCACCCGGCGACCGTGCCGTTGAAGACCCTCAAC---GCCGGTCTCGCCCGCGACCTCGAAGGCCAGCCGAGCGGCGACATCGTCGACGACGACCTCGACTTCTACGGTCTACGCGAATACGAGCCGGGCGACGACGTGCGCAACGTGCACTGGCTGAGCACCGCGAAGACCGGCACGCTGATGATCCGCCAGTACGAGGCGACGCGCCGCACGGACACGGCGCTCACCGTGTCCGTCAATCCGGAGGAGTATGCGAGCGCCGGTGAATTCGAGCTCGCCGTGTCCATCCACGCCTCGATCGGCGTGCGTTGCCTCATGCAGGACAGGCCGTTGTCGACGCACGCCGGCGACGCGCATGCGACG---------------------------------------------------------------------------------------------CCGCGGCATGCGATGGACTTCCTCGACGCGTGCAGCATGATCACG------------------CCCGACCACGAT---------------------------------------------------------------------------------------------------------------------------------------GACAATCCGAATCTCGTCGAAGGCACGCTCACGCACGAC------CCGGACGCCTCGTTCTATTTCCTTACCGTCGGGTCGCTGCGCGAGCTCGACTCGATCAAACGCATGGCGCTCGCCTTG------CCGAAGTCCGCGTCCACGCTTGTCCTGCAGGCCAGCGAG---------------------------------GGCGCTCCCCGTGCGATCCGCCGCTTCCCCGACTTCACGCTCGCCACGGTGGGCGAGCTCGATGACCTGCCGCTCATCATGGGGGTGCTCGCATGA---------------------
>GCF_000772485.1_WP_007051314.1
------------------------------------------------------------------------------------------------------ATGGCATCTACATCCGCC---GCATTACGCCGTCGCCGGCGC------------------------------------------------------------GCTGAACGCATGTTCAAGCGCGCGGTAAGACGCATCAGACGGTTCTTCGCATCCTACGTCTCGCCCTTGGGCTGGGCGGTAACGGGCGCAGGCATCGCATGCCTTATTGCGTTCCCGTTTCTGGGCTGGTATGAGCTGCTCGTATTCGGCATCGTGGCGATGGTGATGATGCTCGCGGCAATCGTGCTTTCCCTCGGCAACACACGCTTCCACGCGTCCATCGTCGTATCCAATCATCGCGTGACCGTGGGAGACACCGTATCCGTTATCGTCGGCATCGAC------AACACCGGCAGAACGCCGACGACCACGGCACGCGGATATCTGCCAATCGGCGAT---------------------------GCGCATGAACGATTCAACATCCCCATGCTGGCTCCCGGGCAATCCAAGCAAACCGATGTGGAGTTCCGTACCGTATCGCGCGCAATACTGCCCATCGGCCCATTGCGCATCCGCAAGGGAGACCCGTTCGGTCTGGTGCGTCACGAAAAGGAGCTGGCCGACCGCATCACCGTATTCATCCACCCTCGTACCGTGCGTCTCGATACTCTGAAT---GCCGGCGTGCCCCGCGACCTGGAAGGCCAACCATCCGGCCAGATCGTGGATGATGATCTCGACTTCTACGGATTGCGCGAATACGAGCCGGGCGACGACGTGCGTAACGTCCACTGGCTGAGCTCCGCGAAAACCGGCACGTTGATGATTCGCCAATATGAGGCCACGCGCCGCACCGACACCTCGGTGACCATCAGCGTGAACCCGGACGAATACGTCAACGGCGAGGAATTCGAGATGGCGGTGTCCATCCACTCCTCCATCGGCGTCAAATGCCTGCTGCAGGATCGTCCATTGTTCTGCCACGCGGGCAACGCGCACGGCCAG---------------------------------------------------------------------------------------------CCGCGCAACGCCATGGAGTTCCTCGACAACGCCAGTGCCATAGAG------------------CCTGATCGTGAG---------------------------------------------------------------------------------------------------------------------------------------GATAATCCGAATCTCGCCGAGGGCACGCTGAAGCACAGT------CCTGATGCTTCGTTCTATTTTTTCACTGTTGGATCGCTGAAAGACATCGAGCAAATCAAGCGCATGACCTTGGCCTTG------CCCCGATCGGCCAGCTGCGTGGTATTGCAGGCCAGCGCC---------------------------------GGTGCCAATCGCGGCATCAGAAGATTCGCCAACTTCACATTGGCCACCATCGGCGACCTCGATGATCTCCCGCTGATCATGGGGGTGCTCGCATGA---------------------
>GCF_000966445.2_WP_082765109.1
ATGCGCCGAAATACGTCAGGAGGATGTTGTGCGACGCATCAGCGAACAGGTTCCGGTACCGTCAATGGGCGGGGAAAGGGCCCTGCCATGACAGCGCGATCCCATTGGCTTCGTCGTCCTGCGTTGGCACCGGCATTGGCACGCTCACCGTTCGCCGCCGCCAGATCCTTTGCCGGCGTGCTGGCGGCGCGAGCACGCTCTTTGACTCCATCGGTTTCGCAACATCGTGCCAAAAGCATGTGCCTGCGACGTCTGCCCGACATCACCCCATCAGGCAGACTTGCCGGATTGTTCGGCATGGTTCTGATTCCGGCTTTCGCCCTGTTGGGTTGGCATGAACTGCTGGTGTTCGCAGTCGTAGTACTGAGCGTGCTGGGTGCGGCACTCATACTCCCCACACCGTGCAGCAGTATCACCGCAGCACTGAGCGTCGACGCCCTGCATGTGGTTCAGGGGCATGATGTCGGCATTCAGATGATTCTGCAT---------ACCCCGGTTTCCGTAATGCTTCCCTCCGCTATGGTTCTGCATATCGACGGC---------------------------ACCCCGCACCATATTCCCGTTCCTCCACTCCACGCCGGGCAGGAGCACCGGATCGATCTGAATCTGAACGCTCCGCCACGCTCACGGATCGCCATCGAATCATTGTCGATACAGCAGGCAGGACCGTTCGCCCTCACTTGCCATGAGCAACGGCTCTGCACAGGACCAACCGTCCACATTCATCCGAGAACCGTCTCCCTGCCATACTCGCTG---ACAGGGCGTTTCCAGGATCTTGACGGCGACGACCTGCCCGGTATTGCGGATGATGGGATTTCCTTTCAGGGGTTACGCCCCTATGTTCCAGGGGATGACATGCGCGGTATGCATTGGCTGAGCACGGCAAAAACAGGTGTTCCGATGATTCGTCAATATGATCGCACCCGTTGTTCAACGACCCGGCTGTGCTTCGATTCGAATGCCTCGGATTATTCGGACAGGGAGGAATTCGAACTGGCCGTATCCGTGGTCGCGTCGATCGGAGCGCATTGTCTGAACCGGCATGATCGCCTATACGTCGATGCCGTTTCAGGTCGGATCGGC---------------------------------------------------------------------------------------------ATTCAACGCGTGGCGGATCTGCTCGACCTGTGCAGCGGCTTCACCCCGCAGACCAAC---------------------------------------------------------------------------------------------------------------------------------------------------------CGGACCGCCCAGCCATGCGACACCGCTTCCCCACCACAG------CACGGCATCTCGATGTACTGCCATGTGATCGGCTCCCGTCATGACGCCCATACGCTGCGATCGCAGATCAAGGGGCGT------TACCCACAAGCCACTCGCATCGTCATAGTGGCGAGCGCC---------------------------------GATGCCGAACCATCCATCGCTCCCCACGCGGACGAGACGATACTTACCGTTGGCTCGCTCGATCAGCTTGCCCAGCTGTGGAAGGCGGTGAGCCGCTATGGGCGCATGGCATGA---
>GCF_001025135.1_WP_003820083.1
---------ATGCGCAGGCACAACGACAGTTCATCATTCGAAGCAAGGCCGCAGAAGCCGCGGAAACCGCGCAAGCCGAAACCACGGAACGAGCGAGGCCAACAGGCATCGGGCAAGTCGGCGCGCCACAGGCGACGGCTTAGC------------------------------------------------------------TCGGCACGCCTGTGGCGCCGCTGCAAGCGCGCGGTCAGGCGATTCTTCACCTCGTTCATATCCCCACTGGGCTGGACCGTGGTCGTCATCGGCATCGTATGCGCGGCCGGATTCCCGTTGGTTCGCTGGCATGAGCTGCTCGCCATCGCCGCGGTGGCGCTGATGATGATCCTCTGCGCCATCGTGCTCTCGCTTGGCAATACCGGGTTCAAGGCGTCCATCGCCGTGTCGCGTCGCCGCGTCACCGTCGGCGACGACGTCCATGTGACCGTGGACATCGAC------AATCCCGGGCGCACCCCCACCACGACCGCACGCGGCGACCTGCCGTTGGGCGAG---------------------------GCTCACGAGCGGTTCGGCATCCCCATGCTGGCGCCGGGCCAGTCCAAGCAGACCGATATCGAGTTCACCACCGTCTCCCGCGCCGTCCTGACCGTCGGACCGTTGAACATCCGCAAGGGAGACCCGTTCGGGCTGGTGCGCCACGAGAAGGCGCTGGCCGAACGCATCACCGTCTATATCCATCCGAACATCGCGCGGCTCAACACGCTCAAC---GCCGGCGTCGCACGGGATCTGGAAGGCCAGCCCAGCGGTCAGATCGTCGACGACGACCTCGACTTTTACGGGCTGCGCGAATACGAGCCGGGCGACGACGTGCGCAACGTGCACTGGCTCAGCTCGGCGAAGACCGGCACGCTGATGATCCGCCAGTACGAGGCGACGCGGCGGACCGACACGAGTATGACGCTCGACGTGAACCCGCAGGATTACGTCAGTCAAGAGGAGTTCGAGATGGCCGTGAGCGTGCACGCCTCGCTGGGCGTGCAGTGCCTCAAACAGGACCGTCCGCTGCAGACGCATGCCGGCAGCGCGCATGACACG---------------------------------------------------------------------------------------------CCGAAATTCCCGATGGGGTTCCTGGACGATTGCAGCGCCATCACC------------------CCGCGGACCGAC---------------------------------------------------------------------------------------------------------------------------------------GACAACCCGAATCTGGTGGAGAGCACGCTGCGACACTCG------CCCGACAGCTCGTTCTACTTCTTCACCGTCGGCTCGCTCAAGCAGCTCGACCATATCAAGCGCATGGTGCTCGCGCTG------CCGAAATCCGCCACGTGCCTCGTGCTGCAGACCTCGCCG---------------------------------GGCGACGTGCGCGCAATCAAGCATTTCACGGACTTCACGCTGGCCACCGTCGGCTCGCTTGACGACCTGCCGCTCATCATGGAGGTGCTCGCATGA---------------------
>GCF_001025175.1_WP_003832681.1
---------------------------------------ATGACCGGCCCATCCGTCACCATTGCGCATCACACACGGCAGTACGGCCACGACAACAAAACCGAGGCGAAGCACAGCGGGGGAATTGCGCATCACACACGGCAG------------------------------------------------------------CTCGGCCAAGCATGCAGACAAGCCACTGCACGAATCCGGCATTGCCTCACTTCCTCTGTTTCCCCGCTGGGTTGGGCAGCAACGGGCTGCGGCACAGCATGCTTGTGCGCATTCCCGTTACTGGGTTGGATCGAACTGCTCACATTCGGCATAGCATCCACGACGATGATGCTCTGCGCAATCCTGCTTGCTCTAGGTAACACCAAATTCGATGCCAGCATTCATGTTTCCCGGCACCGTATCACCGTGGACGGCACAATATCCATCACCGTAAACATCAGC------AACTCCGGCACGGCACCCACCACCAACACCCAAGGCGGTCTTCCCATCGGCAAT---------------------------GACCGCCATCGATTCAGCATCCCCCGGCTCCTGCCCAAACAGACCAAGCACATCAGCATGGAGTTTCATGCCCCAGCCCGGACGGTATTGCCTATTGGACCATTGCATATTCGCAAAGGCGATCCATTCGGTCTTACCCGCCATGAAAACGATCTGGCAGAACGTATCAACGTGTATATCCATCCGAAAATCGTGCGGCTGCCCCTACTGCAC---GCCGGTATTCCTCGCGATCTCGAAGGTCAATCTTCCAGACGAATCGCAGACGATGATATTGATTTCCATGGCCTGCGCAAATACCAGCCCGGCGACGATATACGCAACGTCCATTGGCCAAGCTCCGCCAAAGCAGATTCCTTGATGATTCGCCAATATGAAGCCACATGTCGCACTGATACCTCATTAACGCTCAGCGTGGATGAAAGCGACTACGCTTCGAGGGAAGAATTCGAAATGGCGGTTTCTATTCACGCTTCGATTGGTGTGCAATGCCTGCTGCAATATCGCCCGTTATATGTGCATGTCGGGAAAGCACACACGCAG---------------------------------------------------------------------------------------------CCGCATGACGCCATGTCGTTTCTTGACGCCACAAGTGCCATAGCC------------------TTCCAGCAAGAC---------------------------------------------------------------------------------------------------------------------------------------TTCACCGCGAGCCTTGTCGATGGCACATTGCAGCACAGC------GCCAACGCTTCCCTGTATGTCGTCACCGTTGGATCGAAGAAAACCCTCAGCCGCATAACACGCATGGCCAGGGCACTC------CCCCAATCTGCACGTTGCATAGTGCTGCAGGCAGATATC---------------------------------GGCATGACCTGCAGCATAAGGCGATGCGCCAATTGCACTGTAATCACCATCGGCAAGCTCAACGATCTGCCACTCATGTTGGGAGTTGTGCCATGA---------------------
>GCF_001025195.1_WP_033512809.1
------------------------------------------------------------------------------------------------------ATGCGACAATCCAAAACT------ATGCAACGCAGGAGAACC------------------------------------------------------------ATGCAACGATCCCTGCGACGCATCAAGCATCGCATCAAACGACTGGTCACCTCATATATGTCACCGCTCGGATGGGCCGTGACCGGACTCACCATCGCCTCACTCATAACGTTCACGATTCTCGGATGGCATGAACTGTTGGCCATGGCGATCGTGTTCGCCTGCATGATGGTCGCCGCCATCCTGCTGTCACTCGGCAACACGTCATTCACCGCCACCATAGACGTGTCCAGCAGACGAGTCACCGTGTCAGACACCGTAAAAGTCGACATACGCATCGAC------AATCCAGGACACACGCCAACCACATCCGCGCGAGGCGACCTGCCTATCGGCGAC---------------------------AACCACGAACGATTCTCCATCCCCATACTCGCCGCCGGCCAATCACGCCAAACAACCGTGGAATTCACCGCCGTCTCCCGCGCAGTGCTGCCGATCGGACCGCTTTCCATACGCAAAGGCGACCCATTCGGACTCGTACGGCACGAAAAGAAACTCGTCGACCAAATCAACGTGTTCATCCACCCTCAAACCGTCATGCTGAACACACTCAAC---GCCGGAATTCCGCGAGACCTCGAAGGTCAGCCCAGCGGCGAAATCGTCGACGATGACCTCGACTTCTACGGACTGCGCGAATACGAGCCGGGCGACGACGTGCGCAACGTGCACTGGCTCAGCTCCGCAAAAACAGGAACGCTGATGATCCGCCAATACGAAGCGACCCGACGCACCGACACCGCATTGACCATCAGCGTGAACCCAGACGACTACCTCAGCTCCGACGAATTCGAACTGGCGGTATCCGTCCACGCATCCATCGGCGTACAATGCCTGCTCCAAAACCGCCCGGTAACCGCACATGCAGGAAACGAACACGCCGTG---------------------------------------------------------------------------------------------CCACGCAACTCCACGGAATTCCTCGACGGCTGCAGCGCCATCACC------------------CCCGACATCAAC---------------------------------------------------------------------------------------------------------------------------------------GATGATCCGAACCTCGCGCAAACCACCCTCACCCACACC------CCCGACTCATCGTTCTACTACATCACCGTCGGCAGACTCAAAAGCATCGACGAGATCAAACACATGGCGCTTGCACTC------CCCCGATCCGCAACCTGCGTGGTACTGCAAACCACCATC---------------------------------GGGCAACCACGTGCCATCAAACGATACTCCGACTTCACCCTGGCGACCGTAGGAAGCCTAGACGACCTCCCAATAATCATGGGGGTACTGGCATGA---------------------
>GCF_001025215.1_WP_033524357.1
------------------------------------------------------------------------------------------------------ATGCGACAATCCAAAACC------ATGCAGCGCAGGAGAACC------------------------------------------------------------ATGCAACGATCCCTGCGACGCATCAAGCATCGCATCAAACGACTGGTCACCTCATACGTGTCGCCGCTCGGATGGGCCGTGACCGGACTCGCCATCGCCTCACTCATAGCGTTCACAATCCTCAGCTGGCATGAACTGCTGACCATGGCGATCGTGTTCGCATGCATGATGGTCGCCGCCATCATGCTGTCGCTCGGCAACACGTCGTTCACCGCCACCATAGACGTGTCCAGCAGGCGCGTCACCGTGTCAGACACGGTGAAAGTCGATGTGTGCGTCGAC------AATCCAGGGCGCACGCCAACCACATCAGCACGCGGCGACCTGCCCATCGGAGAC---------------------------AGCCACGAACGATTCGCCATCCCCATGCTCGCCGCCGGCCAATCACGCCAAACCACCGTGGAATTCACCGCCGTCTCCCGCGCGGTACTGCCGGTCGGTCCCCTGTCCATACGCAAAGGCGACCCATTCGGACTCGTACGACACGAAAAGAAACTTGTCGACCAAATCAACGTGTTCATCCACCCGAAAACCGTTATGCTGAACACACTCAAC---GCCGGAATTCCGCGAGATCTCGAAGGCCAGCCAAGCGGCGAAATCGTCGACGACGACCTCGATTTCTACGGACTGCGTGAATACGAGCCAGGCGACGACGTACGCAACGTGCACTGGCTCAGCTCCGCAAAAACAGGCGCACTGATGATCCGTCAATACGAGGCGACCCGACGCACCGACACCGCATTGACCATCAGCGTGAACCCCGACGACTATGTGAGCTCCGACGAATTCGAACTGGCGGTATCCGTCCATGCCTCCATCGGCGTGCAATGCCTGCTCCAAAACCGACCGGTGACCTCACACGCGGGAACCGAACACATCATG---------------------------------------------------------------------------------------------CCACGCAACTCCACGGAATTCCTTGACGGCTGCAGCGCCATCTCC------------------CCCGATATCAGC---------------------------------------------------------------------------------------------------------------------------------------GACAATCCGAATCTGGCGCAAACCACCCTCGCCCATGCC------CCCGACTCATCGTTCTACTACATCACCGTCGGCAGGCTCAAAAACATCGACGAAATCAAACACATGGCGCTCGCACTC------CCCCGATCCGCAACCTGCGTGGTACTGCAAACCGCCATC---------------------------------GGACAGCCACGCGCCATCAAACGATACGCCGATTTCACCCTGGCGACCGTAGGAAACCTAGACGATCTCCCAATGATCATGGGGGTACTGGAATGA---------------------
>GCF_001042595.1_WP_033489779.1
------------------------------------------------------------------------------------------------------ATGCGAAATTCCCGAACA------ACGCTACGCAGACGAACC------------------------------------------------------------ATGATGCGGTTCCTGCGCCGTACCGGACACCGGTTGAAGCGTCTGTTCACCTCATACGTTTCACCGGTGGGATGGATGGTGGCCGTATTGGCCGTAGCCACGTCTGCCGCGTTCGCGATGCTCGGTTGGCATGAACTGCTTGCCATGGCAACGGCATACGCGCTGATGCTGCTTGCCGCGGTAGTGATGTCGTTGGGCAACACGTCATTCTCCGCATCCATCGATGTGTCCAACAGGCGTGTGACCGTAGGCGACACGGTGCAGGTGAGGGTGGCCGTCGAC------AATCCCGGTAACACACCGACCGCCTCGGCACGCGGCGATCTGCCGATCGGAGAC---------------------------AACCACGAACGGTTCACCATCCCGATGCTCGCGGCCGGGCAGTCGCGCCAGACCGACGTGGAATTCACCGCCATGGCGCGTGCGGTGCTGCCGGTCGGCCCGCTGTCGATCCGCAAGGGCGACCCGTTCGGTCTGGTACGCCACGAAAAACGGCTCGTCGACCAGATCCAGGTATTCATTCACCCGCCGACCGTCATGCTCAATACGTTGAAT---GCCGGCATCCAACGTGACTTGGAAGGACAGCCAAGCGGCGAAATCGTGGATGACGATCTCGACTTCTACGGTTTGCGGGAATACGAGCCGGGCGACGATGTGCGTAACGTACATTGGCTGAGTTCCGCGAAAACCGTCTCGCTGATGATCCGCCAATACGAGGCCACACGACGCACCGACACCGCCGTAGGCATCAGCGTGAATCCCGATGACTACACCGACGCCCAGGAATTCGAACTGGCCGTGTCAATCCACGCCTCCATCGGCGTGCAGTGCCTGCTGCAGGACCGCCCGCTGACCGCACACGCCGGCGACGATCACACCACG---------------------------------------------------------------------------------------------CCCCGCAATGCCACGACGTTCCTGGACTCCTGCAGCGCCATCGAA------------------CCGGATCTCGAC---------------------------------------------------------------------------------------------------------------------------------------GACAATCCGAACCTTGCGCAAGGCACACTCGACTACGCC------GCCGATGCCTCGTTCTACTACTTCACCGTCGGCCGACTCAAAGACGTAGACGAAATCAAGCATATGGCGCTCGCATTG------CCACGCTCAGCGACCTGCGTAGTACTGCAGGCAGCCGTC---------------------------------AGCCAACAACGCGCCATACGAAGATTCCCGAACTTCATCCTGGCCACGGTCGGCGATCTGAACGATCTGCCGATGATCATGGGAGTACTGTCATGA---------------------
>GCF_001042615.1_WP_033501624.1
------------------------------------------------------------------------------------------------------ATGCGACAATCCAAAACC------ATGCAACGCAGGAGAACC------------------------------------------------------------ATGCAACGATCCCTGCGACGCATCAAGCATCGCATCAAACGACTGGTCACCTCATATGTGTCACCGCTCGGATGGACCGTGACCGGACTCGCCATCGCCTCACTCATAGCGTTCACGATTCTCGGATGGCATGAACTGTTGGCCATGGCGATCGTATTCGTCTGCATGATGGTCGCCGCCATCTTGCTGTCACTCGGCAACACGTCGTTCACCGCCACCATAGACGTGTCCAGCAGACGAGTCACCGTGTCAGACACCGTGAAAGTCGGCATGCGCATCGAC------AATCCGGGACGTACGCCAACCACATCCGCACGAGGCGACCTGCCTATCGGCGAC---------------------------AACCACGAACGATTCTCCATCCCCATGCTCGCCGCCGGCCAATCACGCCAAACAACAGTGGAATTCACCGCCGTCTCCCGCGCGGTGCTGCCGATCGGACCGCTTTCCATACGCAAAGGCGATCCATTCGGACTTGTACGGCACGAAAAGAAACTCGTCGACCAAATCAACGTGTTCATCCACCCGCAAACCGTCATGCTGAACACACTCAAC---GCCGGAATTCCGCGAGACCTCGAAGGTCAGCCCAGCGGCGAAATCGTCGACGACGACCTCGACTTCTACGGACTGCGCGAATACGAGCCGGGCGACGACGTGCGCAACGTGCACTGGCTCAGCTCCGCAAAAACAGGAACGCTGATGATTCGCCAATACGAAGCGACCCGACGCACCGACACCTCATTGACCATCAGCGTGAGCCCAGACGACTACCTCAGCTCCGACGAATTCGAACTGGCGGTATCCGTCCACGCATCCATCGGAGTGCAATGCCTGCTCCAAAACCGCCCGGTAACCGCACATGCAGGAAACGAACACGCCATG---------------------------------------------------------------------------------------------CCACGCAACTCCACGGAATTCCTCGACGGCTGCAGCGCCATCACC------------------CCCGACATCAAC---------------------------------------------------------------------------------------------------------------------------------------GACGATCCGAACCTCGCGCAAACCACCCTCACCCACACC------CCCGACTCATCGTTCTACTACATCACCGTCGGCAGACTCAAAAGCATCGACGAGATCAAACACATGGCGCTCGCACTC------CCCCGATCCGCAACCTGCGTGGTACTGCAAACCACCATC---------------------------------GGGCAACCACGCGCCATCAAACGATACTCCGACTTCACCCTGGCGACCGTAGGAAACCTAGACGACCTCCCAATAATCATGGGGGTACTGGCATGA---------------------
>GCF_001042635.1_WP_051923166.1
---------------------------------------------------------------------------------------------------------------------------------------GTGCTTGGT---------------------------------------------------------------TCCTTCCTGATGCATGCCGCCCGCCGCGGCATCGCGCGCGCGAACGGATTCGGCGTGTCCCCTCTCGGCTGGATCGCCGCGGTCACGGGTTCCCTGTGCCTGGTCCTGTTCCCGATGACGCAATGGCATGAATTGCTGGCGGCCGGCATCGTCATGGCCACGCTGCTCGTCACGGCCGCCATCCTGGCCCGGGGAGACGCCGGCGTCACGGCTTCCGTCGAAACGCCTCGACGCCGCATCGGCGTCGGCGAGCGCACGTTCTTCGCCATCACCGTCCGC------AATCCCGGTCCGGCGAGATCCGGGGGCGCGACTATCGAGGTCCCGGTCGGCGGC---------------------------GTGCCTCAGCGGCTGGCGGTGCCCCGTCTCGCGCCGGGAGGGGAGACGCGTCTCACCGTGGAATTGCTCGCCAGGGCGCGGGCGGTGCTGTCCATCGGTCCGGTGACGGTGCGCGCCGGGGATGCACTGGGTATGATCCGTCGTGAACGGCCGCTGACCGGCCGGACCACTATATGCATCCACCCGGCCACCATCCGGCTCGATGCGCTCGAG---GCCGGCGTCGCACGCGATCCCGACGGGCTGCCGAACGGGACGGCCGTCGACGACGACCTCGATGTTCAGGGATTGCGCGAGTATGTGCCGGGCGACGATCTGCGCCGCGTGCACTGGCTGAACTCGTCGAAGACGGGCACGCTGATGGTGCGGCAGTACGAGGCGACCCACCGCACCGACATCAGTCTGGCCGTGGACGTCGATCCTGCCGCGCACGCCAGCGAGGCGGAGTTCGAACTCGCCGTATCCGTGTACGCCTCGCTCGGCGTGCGCTACCTGGCCGAGGGGCGCCGGCTGTCCGTCCACGCCGGAAGCCGGCATACGGTA---------------------------------------------------------------------------------------------CCCAAGCGCATTCCGGCCTTCCTCGACGAGTGCAGTGCCATAGTC------------------CCCAACGGCGAT------------------------------------------------------------------------------------------------------------------------------------------GGCGGTCAGGCCTTCCCGTCCGCGGTGCGGCATGAT------TCCCGGGCATCGTTCCGCTGCCTTGTGGTCGGCTCGCTCAGACCGCTTGACTGGATCACGCGCATGGCCATGCCGCCG------TCACGGTCGGCCGGCTGCCTGGTGCTGCGCATCGACGAA---------------------------------CACGCGGAACGGACGGTCCACCACGGCACCGGGTTCACACTGGTCACGGTCGGCGCGCTTGCCGACCTGCCGATAGTGATGGGGGCATTGCCATGA---------------------
>GCF_001263395.1_WP_033503908.1
---------------------------------------------------------------------------------------------------------------------------------------------------------------------------------------------------------ATGAGAGCGCGCGAGAATCAGCCACGCACGGACTGCGGGCCTGTGGAAAGCTGGCTCCGTCTGACCCCCCTGGGTCGGGCCGTGTGCTTGCTGACAGCGGGCAGCGCCTTGGCCTTCCTGGCTTTGGGTTGGGCCGAACTGCTGAGCATGGCCGCCACCGGAATCGCCCTTCTGACCATCGGCCTGGTCCTATCCCGCAACTCCCCAGACCTGAGAGCGGGATTCGAGTCTGAATCCCTGACCCTGCTGGCAGGGCAGGAGACCACAATCTCCCTTTCCGCCTGC------AACACGGGCCGCAGAAGTTCCACCGGAGCCCAAGTGCGCCTGAAAGCGGGCGCG---------------------------GCCTCTTACATATGGCCACTGCCGCGACTGGCACCAGGTCAAAGCGCGCGGCGCACAGTGACCCTGCGCGCCGCCCGCCGAGGAATGGGGTGGATCGGCCCCCTGACCATCCAGCGGAACGACCCCCTCGGCCTGTCCACCAGAGGCCTGACCGCAGCAGGCCCCCTACGACTGGTCGTCCACCCCCGCACCGTGCCGCTGGAGGCAGCCAGTGGAGCTGGCCTCCTCTCCGACCAAGAAGGG------GGATCCGATTGGTCCGAGGAGGGCGTGGACTTCCACAGCTTGCGTGACTACGAACCTGGCGATGACCTGCGCAGGGTCCACTGGCCTTCCGCCGCCCGCACAGGCAGGCTCCTGGTCCGCCGCTACCTGCCCCGCCAAAGCCCGGCGCTGGGACTCTGGCTGGACGCCAATCCGAACGCCTACGCTAGCGCACCGGAATTCGAGCTTGCGGTCAGCCTTCTGGCCTCGCTCGGGTTGGCGGCCCTAGGCGGCGGCTGCGCCCCCCGGCTGACCCTAGGATCAGTCGTGTGGACA---------------------------------------------------------------------------------------------CCAAAGGAGGCGGATGACTGGTTGGACGGGTGCAGCGCCCTGCACTGGGTCGGA---------CCGGATGGAAACCCC---------------------------------------------------------------------------------------------------------------------------TTGGAACCAGCGGCGCTGAGCCAACGCGATGATTCAGCGGAGCTCGCTGACTCGCAACCCCTATCCGCCGCGATCTGCGTCCTAGGATCCCGCACCGTCGCAAGTCAGGTCCAGCGGGCGCTCCTGGGCATGGGCGACCCAGTCAGCGGACGAATCCTGCTGCTGACCGCGAACCTGGGC---TCGCACGCTGACGGCGCGCAATCCGGCGGCGCGGCAATCAGCAGCGCAATCGACGGATGGAAGGTCCGAGCTTCCATTGGCTGTTTGGAGCAGCTCCCGGCATTGTTGGAGGCACTGGCATGA---------------------
>GCF_001281305.1_WP_060620040.1
------------------------------------------------------------------------------------------------------ATGGCATCTGCATCCGCC---TCATTACGCCGTCGCCGGCGC------------------------------------------------------------GCTGAACGCATGTTCAAGCGCACGGTAAGACGCATCAGACGGTTCTTCGCATCCTACGTCTCGCCCTTGGGCTGGGCGGTAACGGGCACAGGCATCGCATGTCTTATTGCGTTCCTGCCTCTGGGCTGGCATGAGCTGCTCGTATTCGGCATCGTGGCGATGGTGATGATGCTCGCGGCAATCGCGCTTTCCCTCGGCAACACACGCTTCCACGCGTCCATCGCCGTATCCAATCATCGCGTGACCGTGGGAGACACCGTATCCGTTATCGTCGGCATCGAC------AACACCGGCAGAACGCCGACGACCACGGCACGCGGATATCTGCCAATCGGCGAT---------------------------GCGCGTGAACGATTCAACATCCCCATGCTGGCTCCCGGGCAATCCAAGCAAACCGATGTGGAGTTCCGTACCGTATCGCGCGCAATACTGCCCATCGGCCCGTTGCGCATCCGCAAGGGAGACCCGTTCGGCCTGGTGCGTCACGAAAAGGAGTTGGCCGACCGCATCACCGTATTCATCCATCCTCGTACCGTGCGTCTCGATACCCTGAAT---GCCGGCGTGCCCCGCGATCTGGAAGGCCAACCATCCGGCCAGATCGTGGATGATGATCTCGACTTCTACGGATTGCGCGAATACGAGCCGGGCGACGACGTGCGTAACGTCCACTGGCTGAGCTCCGCGAAAACCGGCACGTTGATGATTCGCCAATATGAGGCCACGCGCCGCACCGACACCTCGGTGACCATCAGCGTGAACCCGGATGAGTACGTCAACGGCGAGGAATTCGAGATGGCGGTGTCCATCCACTCCTCCATCGGCGTCAAATGCCTGCTGCAGGATCGCCCGCTGGTCTGTCACGCGGGCAACGCGCATGGCCAA---------------------------------------------------------------------------------------------CCGCGCAACGCCATGGAGTTCCTCGACAACGCCAGTGCCATAGAG------------------CCTGATCGTGAG---------------------------------------------------------------------------------------------------------------------------------------GATAATCCGAATCTCGCCGAGGGCACGCTGAAGCACAGT------CCTGATGCTTCGTTCTATTTTTTCACTGTTGGATCGCTGAAAGACATCGAGCAAATCAAGCGCATGACCTTGGCCTTG------CCCCGATCGGCCAGCTGCGTGGTATTGCAGGCCAGCGCC---------------------------------GGCGCCAATCGCGGCATCAGAAGATTCGCCAATTTCACATTGGCCACCATCGGCGAACTCGATGATCTCCCACTGATCATGGGGGTGCTCGCATGA---------------------
>GCF_001417815.1_WP_055426889.1
---------ATGCGACGCACGGCCGACGGC---------------------------------------------------------------------------------------------------------------------------------------------------------------------------------------------------ATCCTGCGCCGCGTCCGCCGTCTGCTCACAGGATACGTCTCCCCGCTGGGGTGGGCGGTGGCGGTCAGCGGAGCGGCCGCCCTCATCGCGTTCCTTCCGCTCGGTTGGCACGAGCTGCTCGCCTATGGCGTGGCGGCCATGACGATGACCCTCGCCGCCATCGTCATGTCGCTCGGCAACACGGCGTTCAAGGCATCAGTCGGACTCGAACGCCGCAGGGTGACCGTCGGAGACACGGTGGCCGTGCGCGTCGACATCGCC------AACCCCGGCCGCATGCCCACGGCGACGGCGCGCGGCGACCTGCCCATCGGCGAC---------------------------ATGCACGAACGCTTCTCCATCCCCATGCTCGCCTCCGGGCAGTCGAAGGAGACCGACATCGAATTCCGCACGCTGTCGCGCGCGGTGCTTTCCATCGGGCCGTTGCGCGTGCGCAAAGGCGACCCGTTCGGTCTGATACGCCACGAGAAGCGGCTCGCCGACCGGCACGACCTGTTCATCCACCCCGCCACCGTCCCGCTCGCCACGCTCAAC---GCCGGACTCGCCCGCGACCTCGAAGGCCAGCCCAGCGGCGACATCGTCGACGACGACCTCGACTTCTACGGACTGCGCGAATACGAACCCGGAGACGACGTACGCAACGTGCACTGGCTGAGCACGGCGAAGACAGGCACTCTGATGATTCGCCAGTACGAGGCGACACGACGCACGGACACGGCGCTGGCCCTGTCCGTCAATCCCGAGGAATACGCATCCTCCGAGGAATTCGAACTGGCGGTGTCCGTGCACGCCTCGATCGGCGTCCGCTGCCTGACGCAGGACAGACCGTTGTCGACGCATGCCGGAAGCATGCACGCCACG---------------------------------------------------------------------------------------------CCACGCCACGCCGCCGATTTCCTCGATTCGTGCAGCATGATCGCC------------------CCCGACCGCGAC---------------------------------------------------------------------------------------------------------------------------------------GACAATCCGAACCTCGTGCAGGGCACGCTCGCGCATGAC------CACGACGCCTCGTTCTACTTCCTCACCGTAGGTTCGCTGCGTGGACTCGACAGCATCAAACGCATGGTCATGGCATTG------CCGCGATCCGCCTCCACGCTCGTATTGCAGACCGATCGG---------------------------------GGCGCCCCGCGCGCGGTCCGCCGCTTCCACGATTTCACGCTCGCCACGGTCGGCGAACTCGACGACCTGCCGCTCATCATGGGGGTGCTCGCATGA---------------------
>GCF_001895165.1_WP_083570082.1
ATGACTGGATTGCTATCCACCGGCCGTCCGCCTGTCGTACTGCGGCCATTGGCGGCCGCCGCGCGTATCGCGTATGGCGTACGCAGCACATATGGCGCACGCAGCGCATATGGCGTACGCAGCGTCGCACATGGCATACGCCGGCGAGCGCACAACATATGGCGA------------------------------------CGAGCGCGCGATGTATGGCATCGCGTTCCCGTCGAATCCGTGCGCCGGCACGCTCGCGTCGTCTCTCCTTTGGGATGGGCGGTATCCGCATGCGCGGTGATATGCCTGACGGTTTTCCCCTATTGCGGATGGCATGAATCGTTGACGTTCGGATTGTTCGCGTCGACTCTGATGACGGTCGCTTTGCTGTCGTCGCTTGGCGGCATGCGATACGATGCCTCGATGCAGGTGTCCGACCGACGAGTCAAAGCGGGCGATGCGTTCAGTGTGCATATGGAGGTCAGCGAGCGTGGCGCGGGCCGATTCCGTATCTCCGGACCGTTTGTGGATCTTCCCATCGGTAGG---------------------------ATGCGCACACGATTCGCCATCCCTCGACTGGCGTCGGGCGAGTCCGCCGTCATGGATGTGCGTCATGTCGCCGAAGCCCGCGCCGTATTGCGAATCGGCCCGCCGCTTATCCGCCAGGGTGACCCGTTCGGTTTCATATGCCGTGAACGGCCTCTGACCACGCACGCCTGTGTGTTCGTCCATCCCGCCACCGTGCGTCTGGTATTGCCGCGC---ACTGGAGTTTCCCACGATTTCGAGGGGTTGGCGAACGGTCGGGTCGTCTCCGACGATCTTGACCTCCACGGACTGCGCCCATACGAGTTCGGCGATGACATACGCCATGCGCACTGGTTGAGCAGCGCGAAAAGCGGGCGGCTGATGATTCGCCAATACGAGGAGACATGCCGCTCCGACACCTCGTTGACGCTTGACGTGGCCGCCGATCATTACGATTCGCCGGAGGAGTTCGAATTGGCCGTATCCGTCCACGCCTCCATCGGCATCGCCTGTCTCGAGCAGGAAAGGGCGATCGCCATGCACGCCGGCACCACGCATATCATG---------------------------------------------------------------------------------------------CCGCATGATGCCTTGGCGTTGCTCGACGCGGCCAGCGCCATACGCCGCAACGTCGGCGATTCCTCCGACACCGACGATGCGGTCAGCGTCGACGTTGCCGACAGAACCAACAGCGCAGATACAGGGACTCGCCCCCGTCACGCTACCGCTGACGCCGACGCCGACGCCGATAGTGTCGGCACAAGGACTCCCCCGCACCAAGCCACCGCCGATGCCGCGAATCTCATGGGCGAAACCGTACGATATACG------CCTCGTGCCTCACGGTACGTGCTGGTCACAGGTTCTCGCACGAGTCTGGACCGGATCGCACATGCCGTGATGGCGCTG------CCCCACTCCGCCCGCCGCGTGGTGGTGCGAGCCGCTCTC---------------------------------GGCGGGTCCGGCGATGTACGGGACCTCGCCGGATTCACCATAGTCGCCGTCGGTTCCTTGGATGGTCTGCCGCCGTTCTCGGAGGTGATCATA---------------------TGA
>GCF_002234915.1_WP_093960357.1
------------------------------------------------------------------------------------------------------ATGGCACGACCGATCACT------CTGCCGCAGCTGCGGCCT---------------------------------------------------------------------------CCGACGCCGGTGCTGCGCGCCCTACGTTTTCTCAGGGACTATGTGTCCCCGCTCGGCTGGACCATATTCGCCGCCGCCGTGCTCTGCACGCTGGGATATGCGCTCCTCGGCTGGGATGAGCTGCTCGCAGCCGCCGTATTGTGGACGATCATGCTCATCGTCGCGATCGTGATGTCGCTGGGCAACACCGGATTCTCGGCGCAGCTCGACGTGCCCACGCGGCGCATCACCGTCGGCGACACGGTCGACGTGAACGTGACGGTAAGC------AATCCCGGACGGTCCGTCACCGCGCACGCGCACGGCGACATCACGATCGGCGAC---------------------------GATCATGAGGGGTTCCCCATCCCCTCGCTGGCACCGCGACAGAGCAAGCAGACCGGGGTGACGTTCACGGCCGCGTCCCGTGCGGTGCTGTCCGTGGGGCCGCTGCGCGTGCGCAAGGGCGACCCGTTCGGCCTGATCCGCCATGAGAAGACCATCGCCGAACGGATCAGCGTGTACATCCATCCCCGCACGGTGCACCTGCACGCGCTCGAC---GCGGGCATCCAGCGCGATCTGGAGGGGCAGCCCAGCGGCGACATCGTGGATGACGATCTCGACTTCTACGGACTGCGGGAATACGAGCCCGGCGACGACATGCGCAACGTGCACTGGCTGTCCACGGCCAAAGCCGGCACGCTCATGATCCGCCAGTACGAGGCCACCCGTCGCACCACCACCGTGCTTGCGATCGGCGTGAATCCCCAAGACTACGCCAGCCGTGACGAGTTTGAACTCGCCGTGTCCGTGCACGCGTCGATCGGCGTGCAGTGTCTGATGCAGCATCGGCCGCTGCGCACGGTAGCCGCCGACCACCGCGACGAC---------------------------------------------------------------------------------------------CCACGCACCACCATGGCGTTCCTCGACGCCTGCAGCGCCATCAAG------------------CCGGATGATCGA---------------------------------------------------------------------------------------------------------------------------------------GAGGACGCGAATCTTGCCGCGTCGGCGCTGGATCATTGC------CCCGACGCATCGCTCTACTGCTTCACCGTGGGTTCGGGCAAGCCGGACGACGTCATCAAACGCATGATGCTCAGCATG------CCCCAGGCGGCCGCCCGTCTGGTACTGCGCGTCGAACCC---------------------------------GGCGCCGAACGCGCCCTGCGACGGTTCGACGGGTTCACGCTCGCCACCGTCGGCGATCTCGACGACCTGCCGCTGATCATGGAGGCCATGTCATGA---------------------
>GCF_002259645.1_WP_094662857.1
------------------------------------------------------------------------------------------------------ATGGCACGACCGATCCCC------CTTTCCCGATTCCGCCCG---------------------------------------------------------------------------ACAACGGCGCTGCTGCAACGCGCC---CTTCTGCGGGATTACGTCTCCCCGCTCGGCTGGACCATACTGGTCGCCGCCGTGCTGTGCGCGGTAGGATACATCGCCCTCGGGTGGAACGAACTGCTCTCCATGACCGTGATCTGGACGATCCTGCTCATCATCGCGATCGTGATGTCACTGGGCAACACCGGCTTCTCGGCACGGCTCGACGTGCCCGCACGACGCATCATGGTCGGGGACGACATCACCGTGAACGTGACGGTGAGC------AACCCCGGGCGCGCCACCACGGCACACGCCCACGGCGATCTTCTGATCGGCGAC---------------------------GACCATGAGGGCTTTCCCATCCCCGCACTGTCCCCACGGCAAAGCAGACAGACCGCCATCGGGTTCACCGCCGCGTCGCGGGCCGTGTTGTCCGTAGGACCGTTGCGGGTGCGCAAAGGCGATCCGTTCGGTCTGATCCGCCACGAAAAGACCGTCGCCGACCGGATCGACGTCTACATCCACCCCCGTACCATACGACTGCACACGCTGAAC---GCCGGAATCCAACGCGATCTGGAGGGACAACCGAGCGGCGACATCGTGGACGACGATCTTGACTTCTACGGACTGCGCGAATACGAACCGGGCGACGACATGCGCAACGTGCACTGGCTGTCCACCGCCAAGGCGGGCACGCTGATGATCCGACAGTATGAAGCCACGCGACGCACCACCACCGCGCTCGCACTCGACGTGGATCCCACGCACTACGCCAGCCGCGAGGAATTCGAACTCGCCGTATCCGTCCACGCGTCGATCGGCGTGCAATGCCTGATGCAGCAGCGTCCGCTGCGAACCGTGGTCGCCGGTCACCGCGACGAC---------------------------------------------------------------------------------------------CCCCGCACCACCATGACGTTCCTCGACGCCTGCAGCGCCATCGAG------------------CCGAAGGACCGG---------------------------------------------------------------------------------------------------------------------------------------CCGGAGACGAATCTCGCCGCGTCGACCCTGAACCACTGT------CCCGACGCCTCGCTCTACTGCCTCACCGTGGGATCCGGCAACCCCGATGACGACATCAAACGCATGATGCTCACCATG------CCGCCAGGCTCATCGCGCATGGTGTTGCGAACCGATCCC---------------------------------AGCGCGCAACGATCCCTGCGACGGTTCGACGGCTTCACCCTAGCCGTCATCGGTAGTCTCGACGACCTCCCGCTGATCATGGAGGCCATGGCATGA---------------------
>GCF_002259685.1_WP_094636549.1
ATGACCGCCTTGCCATCCTTCACATTTCCATTTGCCGCGGTGAGGCCATCCGCGCGCGCCTCA------------------------------------CGCCCAGCGCATGGCCTACGGCGGTTGGTCCGCGGCATAGGGCGT------------------------------------------------------------------------------CGCATTCCCGTCGCGGTTCCACGCCGACAAGCTCGCGTCGTCTCGCCTCTGGGATGGGCGATGGCCGCGTCCGCGGTCGCGTGTCTGGCTCTGTTTCCCTATTGCGGATGGCATGAGTTGTTGACGTTCGGCTTGTTCTCCGCGGTTATGATGGTGGCCGCTTTGCTGTTGTCGCTGGGATCCATGCGGTATGAGGCTTCGATGCGGGTATCCGACCGACGCGTCACTGTAGGGGATGAGGTGTGCGTGCATATGGAGATTCGCGCCCATGGACCACGCCGTTTTCGCATTCCCGTACCATTCGTGGATCTGCCCATCGACGGG---------------------------ATGCATACGCGTTTCGCCATTCCCGCGCTGCCATCGGAAGACTCCGCCGTCATAGACATGCGTCATATCGCCGAAGTCCGCACCGTATTGGAGATCGGGCCGCCGCTGGTATGGCAGGGAGATCCTTTCGGCCTTGTGCGCCGTGAGCGATCGCTGTGCGAACGCGTCAACGTGTTCGTCCATCCAGCCACAGTGCGGCTGGCATTGCCGAGA---ACCGGAACCGCCCATGATTTCGAGGGGCTGGCAAGCGGTCGAATCGTCTCCGACGATCTCGATCTCCATGGACTGCGTCCATATGAATTCGGCGATGACATACGCCATGCGCACTGGTTGAGCAGCGTGAAAAGCGGGCGGCTGATGATCCGTCAATACGAGGAGACGTGCCGGTCCGACGCTTCGCTGACGCTTGACGTGAACGCCGGGCACTACTCCTCATCGGAGGAATTCGAATTGGCCGTCTCCATCCACGCCTCCATCGGCCTCGCCTGTCTCGAACAGGGAAGGATGATCGCCACGCATGCCGGTACCACGCATCGCATG---------------------------------------------------------------------------------------------CCGCGAGACGCCGTCACACTGCTCGACGCGGCCAGCGCCATACGT------------------CCCGACGGCGACGGTCCGATTCCCATAGAC------------------------------------------------------------------------------------------------------------------------------------------GAGACCGTGCATCATACG------CCCCATGCCTCATGGTACGGGCTTGTCGTCGGATCCAACATCGATATCGACCAGATCGCACGAGCCACGACGATGTTG------CCGCGTTCCGCCCGTCGCGTGGTGGTGAGGGCCGCCCTC---------------------------------GACGAGTCCGGCGACGTGTTTGGCCTCGCCGGATTCACCGTGGTCACCATCGGATCACTCAAGGATCTGCCGTCGTTTGCGGAGGTGATCATATGA---------------------
>GCF_002259745.1_WP_094667134.1
------------------------------------------------------------------------------------------------------ATGGATACCGCATCCGCCACGGCGCTGCGCCGACACCGCCGG------------------------------------------------------------CGCGAACGCAGGCTGAAGCGCGCCGCCAAGGCGGTCAGACATGCCGTCACCTCCTACGTCTCCCCGCTGGGCTGGATGACCTTGGGGGCTGCGGCGGCATGCCTGCTGGCCTTCCTGCCGCTGGGCTGGACCGAATTGCTGGCATTCGCCATCGTGGCCGGAACGATGATGCTCGCCGCAGTGGTGCTCTCCTTGGGCAACACCCGATTCAACGCCGCAATCTCCCTGTCCAACCGCCGAGTGACCGCAGGCGACACGGTGACGGTTCTCGTCGACATCGAC------AACCGTGGCCGCACTCCGACCGCCACGGCCCGCGGCAATCTGCCCATCGGAGAC---------------------------GCCCACGAGCGGTTCACCATCCCCATGCTGGGTCCCGGACAGGCCAAGCAGACCGAAGTGACATTCCGTGCGGTCTCCCGTGCGGTGCTGCCCATCGGCCCGCTGCGCATCCGCAAAGGCGACCCGTTCGGCCTGATCCGCCATGAGAAGGAACTAGCCGAACGGCTCACCGTGTTCATCCATCCGGCCACAGTGCGACTGAACACCTTGAAT---GCCGGCGTGCCTCGTGATCTGGAGGGGCAGCCGTCCGGTCAGATCGTCGATGACGACCTTGACTTCTACGGATTGCGCGAATACGAGCCCGGAGACGATGTGCGCAACGTGCATTGGCTGAGCTCCGCGAAAACCGGTACCCTGATGATCCGTCAGTACGAGGCCACACGACGCACCGACACCTCGGCGACGATCAGCGTCAACCCGGACGACTACGCCAGCAGCGAGGAATTCGAATTGGCCGTATCCATCCACGCCTCCATCGGGGTGCAGTGTCTGCTGCAGGATCGGCCCCTGTACTGCCATGCCGGCGCATCGCATGCCCGC---------------------------------------------------------------------------------------------CCGCGCAATGCCATGGCGTTTCTGGATGCAGCCAGCGGCATCGGG------------------CCGGACCGCGAC---------------------------------------------------------------------------------------------------------------------------------------GACAATCCGAATCTGGCGCAGGAAACGCTCAGTCATGCA------CCGGACGCCTCATTCTATTACTTCACCGTCGGTTCGATGAAGGACCTCGACCAGATCAAACGCATGACCCTTGCGTTG------CCGCGTTCGGCCAATTGCGTGGTATTGCAGGCTGATTCC---------------------------------GGCGCGAATCGCGGCATTCGCCGGTTCGCCAACTTCACGCTCGCGACGGTGGGCGAACTCGACGACCTGCCGCCCATCATGGGGGTGCTCGCATGA---------------------
>GCF_002259755.1_WP_094730576.1
------------------------------ATGGAGGAATTCGTCATGACTATGCCATTGATGTCATTTATTCGTCGGCGTACGTGTCACGCGTACGATTCCATTTCCCAAGGGCAAGAGGCTGCTGTGCCAACATCTATTGCGGCTCCT---------------------------------------------------GCGGTGCAATTCAACAATGCTTGTGCCTCGTTGAAAACCCGCATTCGAGTAAGCAACGTATTATCTACCCGAGGATTATTGTCCGCATTATTCGTTGTTATCTGTCTTGCAATATGGTTTCCAACACGATGGCATGAGTTTCTGGCTTGTGCCATCATGCTCAGTTGCATGCTCATTGTGGCGCTCATATCGTGTATCCAAACTGGTTCACTACGTGTTGATATTCCTAGTCCAGAACGCTCGGCTGTCGCCGGAGAAACTATTGAGATGTCACTTGTGATCACC------AATGTTTCACGTATCCGCCCAGCACGATGTCGCTTACAGCTACCAGTTCGTGATCACACATCTACC---------------GCACAGCACATCGTTGATGTTCCTCGCATCCAACGCGGGACATCACGTACTGTGAAAGTCCCACTCATGCCAACGGCACGAACAGTACTACATATTGGACCAGCTAGTACGTCGCCTTCAGATCCATTCGGCTTATGCGGGAAGACACGAGATCTGTCTGAGACAGTCAATGTTCACGTGCATCCGTTTACTACAGCAGTCTCACTGCCGCGT---ACGGGCTTTATTCACGATCCACAAGGACTGCTCTGTGGCGATCAGGTGAGCGATGGGCTTGATTTTCAATCATTGCGAGAGTACCAGCCCGGCGATGATTTGCGTAACGTTCATTGGCCGAGTTCAGCGAAATCTGATGTGCTGATGATACGTCGATACACTGCTATGCGTCGTGTTGACACTGGGTTGACACTGGTGTCTGACGCGGATGCTTACTCAGATGCGAATGAATTTGAAATAGCGGTCGCTGCATATGCGTCACTGGGCGTGGCTTGTATTAAGGCTCAGCGGCCGTTATCCGTATCCGCTGGAGGCAAGGTTTTCCGA---------------------------------------------------------------------------------------------CCAATAGATATGCAGTCATTTCTTGATGCTTGCAGCGACCTTATATATGGTGATGATCATGCCACGGGCGAACAGCAA------------------------------------------------------------------------------------------------------------------------------CATGTACCTGTGCAATCAAGTGAAGATGAGAGTATTGAACGTTCTCGCCTTGACCAGCGTATATGCCAGATGCTCGTTACCGGTTCACGCATGCATGATGAGCGCATCGCTGCATTGACTGAATCCAGT------CCACATGCCGCTTATCACGTAGTGATCACAGTACAACAA---------------------------------GATAAGCCGTGCCATGTGGCAATGTTGCCGTGGTATGTTCTCATGACAATCAGCTCATTGCAGGATCTCCCTACGGCGATGGGAGCATTGTTATGA---------------------
>GCF_002706665.1_WP_026643642.1
------------------------------------------------------------------------------------------------------ATGACCGATTCCGCAGCACGCGCACTG---CGCCGGCGCGCG------------------------------------------------------------TTCCAGCAACGCGCGCGCCGGGCCCGCAGGCGCGCACAGCGCGCGCTCACCGCCTACATCTCGCCGCTCGGCTGGGCCACGATCGCGTGCGCCGCCATCTGCCTGACCCTGTTCGCCACGCTCGGCTGGCATGAGATGCTCGCCGCGGGCCTCGTGTGCGTGGCCATGCTGCTCGCCGCGCTCGTGCTCTCGCTCGGCAACACGTCGTTCCACGCGTCGATCGATGTCTCGCAGCGCCGCGTGAGCGTGCACGACGCTGTGCATGTGCAGGTGACGGTGGAG------AACCCGGGCGCCACGCCGACCGCGAGCGCACGCGCCGACCTGCCGATGGGCGAC---------------------------GAACACGAACGCTTCGGCATCCCGATGCTCGCGAGCCACCAGTCGAAGCGCACCACGGTGAGTTTCACCGCGATTCAGCGCGCCGTGCTGCCGATCGGCCCGTTGATGATCCGCAAGGGCGATCCCTTCGGCCTCATGCGCCACGAGCGTCGGCTCGCCGAACGCGTGACCGTCTACATCCACCCCACCGTGGTGGCGCTCGGCATGCTGCAC---GCCGGCATTCCGCGCGACCTCGAAGGCAACCCGACCGGCGACATTGTGGACGACGACCTCGATTTCTACGGCCTGCGCGAATACGAGCCGGGCGACGATGTGCGCAATGTGCACTGGCTGAGCAGCGCGAAGACCGGCACATTGATGATCCGCCAGTTCGAAGCCACGCGGCGCACCGACACGTCGCTCAGCCTCGGCGTGAACCCGGACGACTACGTGGATGCAGGCGAATTCGAGCTCGCCGTCAGCGCCCACGCGTCGATCGGCGTGCAGGCGCTGCGCGAGGACCGGCCATTGTATGTGCACGTGGGCGCCACACACACCAAT---------------------------------------------------------------------------------------------CCAGCCAATCCCATGGTGTTCCTCGACGAGTGCAGTGCCGTCGAG------------------CCGCGGCTCGGC---------------------------------------------------------------------------------------------------------------------------------------GACGAGCGCAACCTCGCGCAGGGCGCGCTCGCGTTCACG------CCGGACGCCTCGCTGTACTGCTTCACCGTCGGCTCGCTCAAACCGCTCGACGACATTCGGCGCATGGCGTCCACGTTG------CCGCGCCCGGCACGCGTCGTCGTCGTGCAGACCGCGCCG---------------------------------GGCGCCACGCGCGGCCTGCGTGATTTCGGCGATTTCACGCTCGCCACGATCGGTGAGCTCAATGATCTGCCGCTCGTCATGGGAGCGATGCGATGA---------------------
>GCF_002715865.1_WP_015021443.1
------------------------------------------------------------------------------------------------------ATGACCGCTTTCGCCAGCCGACCTGCCCAGGAAGCAAGACCG---------------------------------------------------------GTCTCCTCGACAGGAGCCAGACAGGGCCTGCGAGCCCAGGCCGCTGACCTTTGGCAGTCGGTCACTGCCCTGGGCCGGGCTATGGCCTTGGCGGCGCTCATTTGTGCTCTGGCCTTCGTCCCGACTGGTTGGCGTGAACTGCTTGCGGGCGTTCTGCTGGGCGCAGGTATGCTGCTGCTGGGGCTACTGATGAGCCTGGGCAACCTGTCCTGTATCGCTGAAACGCACCTGGACCAAGGACATCTGGAGGTAGGCGGTCAGGCTGAACTGGTCCTGGTTCTGACC------AATCCGGGCAGCCACCCCACCCGTCACGGCCGAATCGGCCTGGCTCTATGCCAA---------------------------GGAACCGTCATGGCGCCATTGCCGGCCCTGGCTCCCGGCCAGAGTCACCAGATCCGTTTGAAACTGGAAGCCCGATCTCGTGGCGTGATTGACCTGGGCCCGGTGACCATGGAGGCCGGGGATCCGCTGGGACTCATCCGCCGTCGCCGGATTCTGGCTGATGCCCGAAAACTCTATATCCATCCCCGCACGGTGTCCCTGCCGCACCTTGAA---GCCGGACTTGAACGCGACCTGGAGGGGGATCCTGGTCCCGGCATTGTAGACGACGACCTGGAATTCCATGCTCTGCGCCCCTATGCTCCGGGCGATGATATGAAGCGGGTCCACTGGTTGTCCACTGCCCGGGCCGGTACCCTGATGGTCCGCCAGTATGAGCCCACCCTGCGCACCAGGACTGAACTGATCCTGGACGGCCAGGCCGCCTCCTACCGGAACGCAGATGAGTTTGAACTGGCAGTTGAAATCTATGCCTCCTTGGGCTGCCGATGCCTGCTTGATGGCCGTCGGCTGCGAGCGCTGGCCCCGGAACCCGACAATTCCGGTGCCCATGGAACCACC---------------------------------------------------------------------CTGCCCACGGAGGATCCGCGTAGCTTTCTGGACGCCTGCAGTGCCATCCACCCA------------------------------------------------------------------------------------------------------------------------------------------------------------------CGCCAAGACGGCTACGATTTACTTGACCGGACTGAT---GCTTGCGAACAGATCAGTCTGACCATTCTGGTAACCGGTTCGCTGGGCGACCGCCAACCCTCAGCGCTGATGGGCGAATCGGCT------CAGAGCGCCTCCCCGGTCATGCTGCTGGCTGCCGACCTG---------------------------------GATGCTCATCCAAGCCTGCAGACCCAGCCAGGCCTGGTCAACGCCGTTTTGGGTAGTATTCGGGACCTCCCCTTCCTCTTGGAGAACCAACCATGA---------------------
>GCF_002761235.1_WP_099720759.1
------------------------------------------------------------------------------------------------------ATGACCGATTCCGCACTGCGCGCCAGGGCGCGCAAACGTGCG------------------------------------------------------------TTCATACGCGGCTGGAGCCGTTTCACGCGCCGCGTGCGTCACCTCGTCACCGCCTACGTCTCGCCGCTCGGATGGACGGCGCTCGCGCTCGCCGTCGCCGGCCTCGTGCTCTATCTCACGCTCGGCTACGTGGAGATGCTCGCGCTGTGCCTCGTGCTCGTGACGATGCTGCTCGCCGCGCTCGTGCTGTCGATCGGCAACACGTCCTTCGACGCGACGATCGAGGTCTCCGACCGCCGCGTCAGCGTCGGCGACGAAGTCAAGGTGCAGGTCGACATCGCC------AATCCGGGCACGACGCCGACGGCGAGCGCGCGCGCCGACCTTCCGCTCGGCGAC---------------------------GAACACGAGCGTTTCCCGATCCCGCTGCTCGCGCCGCGCCAGTCGAAGCACACGACGGTCACGTTCCGCGCGATCTCGCGTTCGGTGCTGCCCGTCGGCCCGCTGACGATCCGCAAGGGCGACCCCTTCGGCCTGATGCGGCACGAGCATGAGCTCGCCGACCATTTCAACGTCTACATCCATCCGGACATCGTCATGCTCGACTCGCTGCAC---GCCGGCATCCCGCGCGACCTCGAAGGCAACCCGAGCGGCGACATCGTCGACGACGACCTCGACTTCTACGGCCTGCGCGAATACGAGCCCGGCGACGACGTACGCCACGTCCACTGGCTCTCCTCGGCGCGCACGCGCACGTTGATGCTGCGCCAGTACGAGGCGACGCGGCGCACCGACACGTCGGTGACGCTCGACGTCAACCCGGACGACTATCTGAGCAAGGACGAGTTCGAACTCGCCGTCAGCGTGCACGCGTCGATCGGCGTGCAGGCGCTGCTCGAAGACCGTCCGCTCTACACGCATGTGGCGCGCACGAACCTCAAC---------------------------------------------------------------------------------------------CCGCGCAATCCGATGGAGCTGCTCGACGCATGCAGCGCGATCGAG------------------CCCGACTTCCGC---------------------------------------------------------------------------------------------------------------------------------------GACCGGCGCAATCTCGCGCAGGAGGCGCTCGCCGCGACG------CCGGACGCGTCGTTCTACTGCTTCACGGTCGGCCATGCGAAACCGCTCGCCGACATCCGCCGCATGATGATGGCGCTG------CCGCCGAGCGCGACCTGCCTCGTGCTGCAGACGTCGCCG---------------------------------ACCGAGCCGCGCACATTGCGCCGCTTCCCCGACTTCACGTTGGCGACCGTCAATACGCTCGACGACCTTCCGCAGATCATGGGGGCACTGAGATGA---------------------
>GCF_900094885.1_WP_091847750.1
---------------------------ATGCACTTTCCCACCAACCACCAGCAACAGTCTCAATCAGCGCCATCCCGCGACCTCACATCTGCGCGGAACACGGCTGAGACACCTACAGAGAGCAGTTTGGAAGGCCCTCGATCGAAGATTCGCAAGTTCCGACCCACGTTCGAAAATGCCCGATTTGCGGGCCTGCCATTCAAATTCCGGTACAGAACTACAAATTTACGCTACAAGCTGCCCGGCTGGCTCACCACTTACATCTCTCCTCTCGGCTGGTCGATCACAGCAATTGCACTGGTTTGCCTGGCGGCTTTCCCCGCACTTGGATGGCACGAGCTGTTGGTTTGTGCCGTAATCGGCTTGATCATGCTCATCTGCGGCATCGTGATGTCGCTTGGCAACACAACATTCCAGTCGGCACTTTCCGTTTCGAACGACCACATCGCCGTAGGCGATACCGTTAAAGTCGACGTCGATATCTCT------AACCCCGGCAAACGCCCCACCGCCAGCGTCATCGGTGATCTGCCAATGGGCAGG---------------------------GCACATCAGCATTTCCGCATTCCGAGACTCGCTCCGGGCAAAAGTTGGGACAAGAAAGTTGAATTCCACGCCATGGCACGCGCAATTCTTCCCGCAGGTCCTTTAACGATCAGTAAAGGGGACCCGTTCGGAATCGTACGGCACGAACAGTCGCTTTCCGAATCGGTGAATATCTTCATCCATCCCAAAACCATCTTGCTCAACACCCTCGAT---TCCGGTGTTTTCCGCGATCTCGAAGGAAGCCCATCCGGTCAAGTGGTTGACGATGACCTCGACTTCTACGGCCTGCGCGAATACCGCAGCGGCGACGACATACGCAACGTTCACTGGCTTTCGTCAGCGAAAACCGGTTCCTTGACGGTCCGCCAATACGAAGCCACCAAACGAACCGACACATCCATCACTCTGAGCATCAACCCCGCTGATTACGCCTCCGAGGATGAGTTCGAACTGGCCATCAGCGTCGCCGCGTCGATCGGAGTCGAATGTCTTGTCGAAGACCGGCCCCTGTCCACGCAGGCTTCCAAGGACTCGCTCATC---------------------------------------------------------------------------------------------ACACACTCCCCCACCTTTTTGCTCGACTGGATGAGCGGAATCAAA------------------CCGGACCCGGAC---------------------------------------------------------------------------------------------------------------------------------------GAGAACCCCAACCTTGCAGACACCACACTGCGCACGAGT------CCAGGAGCATCCTTCTATTTCTTCATCGTCGGCTCCGGAGCCAAACTCGAACGACTGCGCCGCATTGCAGCCGCTTTG------AGCCATGAATCCGTCTGCATCATGCTGCGAATCGACACC---------------------------------TTGGCGACCAATGGCATTCATCAATACGACGACTTTACCTTGGCCACACTTCCATCACTCGACGATTTGCCGCAGATTATGGAGGCTCTGAAATGA---------------------
>GCF_900129045.1_WP_081888390.1
ATGCGCCGAAATACGTCAGGAGGATGTTGTGCGACGCATCAGCGAACAGGTTCCGGTACCGTCAATGGGCGGGGAAAGGACCCTGCCATGACAGCGCGATCCCATTGGCTTCGTCGTCCTGCGTTGGCACCGGCATTGGCACGCTCACCGTTCGCCGCCGTCAAATCCTTTGCCGGCGTGCTGGCGGCGCGAGCACGCTCTTTGACTCCATCGGTTTCGCAACATCGTGCCAGAAGTATGTGCCTGCGACGTCTGCCCGGCATCACCCCATCAGGCAGACTTGCCGGATTGTTCGGCATGGTTCTGATTCCGGCTTTCGCCCTGTTGGGTTGGCACGAACTGCTGGTGTTCGCAGTCGTAGTACTGAGCGTGCTGGGTGCGGCACTCATACTCCCCACACCGTGCAGCAGTATCACCGCAGCACTGAGCGTCGACGCCCTGCATGTGGTTCAGGGGCATGATGTCGGCATTCAGATGATTCTGCAT---------ACCCCGGTTTCCGTAATGCTTCCCTCCGCTATGGTTCTGCATATCGACGGC---------------------------ACCCCGCACCATATTCCCGTTCCTCCACTCCACGCCGGGCAGGAGCATCGGATCGGCCTGAGTCTGAACGCTCCGCCACGCTCACGGATCACCATCGAATCATTGTCGATACAGCAGGCAGGACCGTTCGCCCTCACTTGCCATGAGCAACGGCTCTGTACAGGACCAACCGTCCACATTCATCCGAGAACCGTCTCCCTGCCATACTCGCTG---ACAGGGCGTTTCCAGGATCTTGACGGCGACGACCTGCCCGGTATCGCGGATGATGGGATTTCCTTTCAGGGGTTACGCCCCTATGTTCCAGGGGATGACATGCGCGGCGTGCATTGGCTGAGCACGGCAAAAACAGGTGTTCCGATGATTCGTCAATATGATCGCACCCGTTGTTCAACGACCCGGCTGTGCTTCGATTCGAATGCCTCGGACTATTCGGACAGGGAAGAATTCGAACTGGCCGTATCCGTGGTCGCGTCGATCGGAGTGCATTGTCTGAACCGGCATGATCGCCTATACGTCGATGCCGTTTCAGGTCGGATCGGC---------------------------------------------------------------------------------------------ATTCAACGCGTGGCGGATCTGCTCGACCTGTGCAGCGGCTTCACCCCGCAGACCAAC---------------------------------------------------------------------------------------------------------------------------------------------------------CGGACCGCCCAGCCATGCGACACCGCTTCCCCACCACAG------CACGGCATCTCGATGTACTGCCATGTGATCGGCTCCCGTCATGACGCCCATACGCTGCGATCGCAGATCAAGAGGCGT------TACCCACAAGCCACTCGCATCGTCATAGTGGCGAGCGCC---------------------------------GATGCCGAACCATCCATCGCTCCCCACGCGGACGAGACGATACTTACCGTTGGCTCGCTCGATCAGCTTGCCCAGCTGTGGAAGGCGGTGAGCCGCTATGGGCGCATGGCCTGA---
>GCF_000771625.1_WP_051917267.1
---------------------------------------------------------------------------------------------------------------------------------------------------------------------------------------------------------------------atgttgaaacactacgctcaccgcatcaaacatgcctttggagcatatgtttcaccgtggggatgggcagtaggagccactgcggcaatcagtctatcgttattccctgttctgggatggcacgaacttctagcgcttggcatcgtggcaacggtaatgctctcagcggccattgcactatccttgggcaatactcgatttgacgcacatatcaaagcatcaagccagcgcgtgaccgtgggcgattccatgcgcatcattgtcgatatcaac------aatacggggaaaacagccaccactcatgcgcgaggcgatttgccgctcggtgaa---------------------------actcatgagcgtttcaccatccctatgctggcctcggggcaatccaaacgtactgaattatcattccgcacagtgtctcgagcggtgctcgccgtaggccctctgcgggttcgcaagggcgatcctttcgggcttatccgtcatgaaaagcaattgggcgagcgtctcaccattttcattcatcccaaaaccgtaagactgaatacgcttaat---gccggcgttcctcgagacctcgaaggccagccgtccggtcacatcgttgacgatgatctcgatttctacgggcttcgtgaatatactcccggcgatgatgtacgcaacgtacattggctcagctcagcaaaagccggatcgttaatgattcgtcagtatgaagcaaccaaacgaacggacacttcattgactattggcgttgatcccaatgattatgccactgcgcaggaattcgaaatggctgtgtccattcacgcatccatcggagtgaaatgtctgttccaggataggccggtgtttacgcacgcaggtcaatcctatacacgc---------------------------------------------------------------------------------------------ccacgcaatgctatggaattgcttgatcaggcaagcggtatcacg------------------cctgaccgtgag---------------------------------------------------------------------------------------------------------------------------------------gacaaccccaatctggcggtaaataccctgacacatgcc------ccggatgcttcattctatttctttaccgtgggatcgttgaaaggcctcgatcatatcaaacgtatgaccaaagctttg------ccccgttcagccagatgcgtggtgttgcaagctcatctg---------------------------------ggggcaaaccgaaccatcaagcaattcaacaatttcactttggccacggtaggcgaattggatgatctgcctatcatcatgggggtgctcgcatga---------------------
>GCF_000741325.1_WP_033489427.1
------------------------------------------------------------------------------------------------------ATGACCGATTCCGCGGCCCGTACGAGGCAGCGCAGACGCGCG------------------------------------------------------------TTCATACGCGGCTGGAACCGCTGCATCCGCCGCGTGCGGCATGCCGTCACCGCCTACGTCTCGCCCCTCGGATGGACGGCGATCGCGCTCGCTGCTGCCGGACTCGCGCTGTTCCTCACACTCGGCTACGCGGAGGCGCTCGCGATATGCCTCGTGCTCACCGCGATGCTGCTCGCCGCGCTCGTGCTGTCTATCGGCAACACGTCGTTCGACGCGGCGATCAGCGTCACCGACCGGCGCGTCAACGTCAACGACGTCGTTTCGGTGCAGGTGGACGTCTCG------AATCCGGGCACGACGCCGACCGCGAGCGCACGCGCCGACCTGCCGCTCGGCGAC---------------------------GAGCACGAGCGCTTCGGCATACCGATGCTCGCACCACGCCAGTCGAAACAGACGACGGTCACGTTCACTGCGCTGTCGCGTTCCGTGCTTACCGTCGGCCCGCTCACGATCCGCAAGGGCGACCCGTTCGGTCTCATGCGCCATGAGCACCGGCTCGCCGACCATTTCAACGTCTACATCCATCCGAAGATCGTCATGCTCGGTTCGCTGCAT---GCCGGCATCCCGCGCGACCTCGAAGGCAACCCGAGCGGCGACATCGTCGACGACGACCTCGATTTCCACGGCCTGCGCGAATACGAGCTGGGCGACGATGTGCGGCACGTCCATTGGCTCAGCTCGGCGCGTACACGCACGCTCATGCTGCGCCAATACGAGGCGACGCGCCGCACCGACACGTCGGTGACGCTCGACGTCAATCCGGACGACTACATGAGCAAGGACGAGTTCGAACTCGCGGTGAGCGTGCATGCGTCGATCGGCGTCCAGGCGCTACTCGAGGACCGGCCACTCTACACGCACGTGTCGCAGTCGAACCTCAAC---------------------------------------------------------------------------------------------CCCCGCAACCCGATGGAGCTGCTCGACGCATGCAGCGCGATCACG------------------CCGGATTTCCAT---------------------------------------------------------------------------------------------------------------------------------------GACAGCCGCAACCTTGCGCAGGCCGCGCTCGCGACGACC------CCGGACGCGTCGTTCTTCTGCTTCACGGTGGGGCATGCGAAACCCCTCGACGACATCCGCCGCATGATGATGGCGCTG------CCGCCGAGCGCGACGTGCCTTGTGCTGCAGACGACGCCG---------------------------------AACGAGCCGCGCACCCTGCGCCGGTTCCCCGATTTCACGCTGGCGACCGTCCGCACGCTCGACGACCTTCCGCAGATCATGGGGGCGTTGCGATGA---------------------
